# Supplementary material for: Cu-Based ternary deep eutectic solvents for homo- and cross-coupling reactions of terminal alkynes
Source: Royal Society of Chemistry journal article supplement (doi:10.1039/d3gc01166f), 2023-01-01

## Supporting Information

### Cu-Based Ternary Deep Eutectic Solvents for Homo- and Cross-Coupling Reactions of Terminal Alkynes

Weixu Lu,<sup>a</sup> Ming Bao<sup>a</sup> and Xiaoqiang Yu<sup>\*a</sup>

<sup>a</sup> State Key Laboratory of Fine Chemicals, Dalian University of Technology, Dalian, Liaoning 116023, China.

*E-mail: yuxiaoqiang@dlut.edu.cn*

#### Table of contents

|                                             |    |
|---------------------------------------------|----|
| 1. General information .....                | 2  |
| 2. Procedure for optimization studies ..... | 2  |
| 3. Experimental procedures .....            | 3  |
| 4. Characterization of products.....        | 5  |
| 5. References .....                         | 10 |
| 6. NMR Spectra .....                        | 12 |

## 1. General information

All reactions were carried out using oven-dried schlenk tube (25 mL) and magnetic stirring (the speed is 1000 rpm) under air unless otherwise stated. All commercially available compounds were purchased from J&K, Alfa, Energy, TCI or Aladdin. TLC was carried out on SiO<sub>2</sub> (silica gel 60 F254, Merck), and the spots were located with UV light (254 nm). Flash chromatography was carried out on SiO<sub>2</sub> (silica gel 60, 200-300 mesh). <sup>1</sup>H and <sup>13</sup>C NMR spectra were recorded on a Bruker Avance II-400 spectrometer (400 MHz for <sup>1</sup>H, 101 MHz for <sup>13</sup>C). CDCl<sub>3</sub> and TMS were used as a solvent and an internal standard, respectively. The chemical shifts were reported in ppm downfield (δ) from TMS, the coupling constants *J* are given in Hz. The peak patterns were indicated as follows: s, singlet; d, doublet; t, triplet; m, multiplet; q, quartet. IR spectra were recorded on a NEXUS FT-IR spectrometer. Raman spectra were recorded on a DXR Raman Microscope spectrometer.

## 2. Procedure for optimization studies

**Table S1 Optimization for the homo-coupling reaction<sup>a</sup>.**

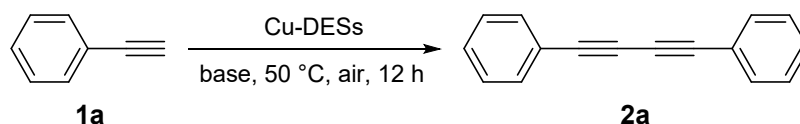

| Entry | DESs name | Base (equiv.)                       | Yield (%) <sup>b</sup> |
|-------|-----------|-------------------------------------|------------------------|
| 1     | Cu-DESs-1 | -                                   | 3                      |
| 2     | Cu-DESs-2 | -                                   | 81                     |
| 3     | Cu-DESs-3 | -                                   | 99                     |
| 4     | Cu-DESs-4 | -                                   | Trace                  |
| 5     | Cu-DESs-5 | -                                   | 40                     |
| 6     | Cu-DESs-6 | -                                   | 53                     |
| 7     | Cu-DESs-7 | -                                   | Trace                  |
| 8     | Cu-DESs-3 | DBU (2)                             | 39                     |
| 9     | Cu-DESs-3 | Na <sub>2</sub> CO <sub>3</sub> (2) | 11                     |
| 10    | Cu-DESs-3 | K <sub>2</sub> CO <sub>3</sub> (2)  | 46                     |
| 11    | Cu-DESs-8 | -                                   | 99                     |
| 12    | Cu-DESs-9 | -                                   | 84                     |

|                 |           |   |    |
|-----------------|-----------|---|----|
| 13 <sup>c</sup> | Cu-DESS-8 | - | 90 |
| 14 <sup>d</sup> | Cu-DESS-8 | - | 79 |
| 15 <sup>e</sup> | Cu-DESS-8 | - | 99 |
| 16 <sup>f</sup> | Cu-DESS-8 | - | 82 |
| 17 <sup>g</sup> | Cu-DESS-8 | - | 86 |
| 18 <sup>h</sup> | Cu-DESS-8 | - | 6  |
| 19 <sup>i</sup> | -         | - | 43 |

<sup>a</sup> The reaction was carried out using **1a** (0.3 mmol) in Cu-DESSs (0.6 mL) at 50 °C for 12 h in air. <sup>b</sup> Isolated yields. <sup>c</sup> Temperature is 40 °C. <sup>d</sup> Temperature is 30 °C. <sup>e</sup> Reaction time is 8 h.

<sup>f</sup> Reaction time is 5 h. <sup>g</sup> Under O<sub>2</sub> atmosphere, reaction time is 5 h. <sup>h</sup> Under N<sub>2</sub> atmosphere, reaction time is 8 h. <sup>i</sup> The reaction was carried out using 0.6 mL EG, 0.15 mmol Cu(OAc)<sub>2</sub>, and 0.3 mmol ChCl for 8 h.

**Table S2 Optimization for the cross-coupling reaction<sup>a</sup>.**

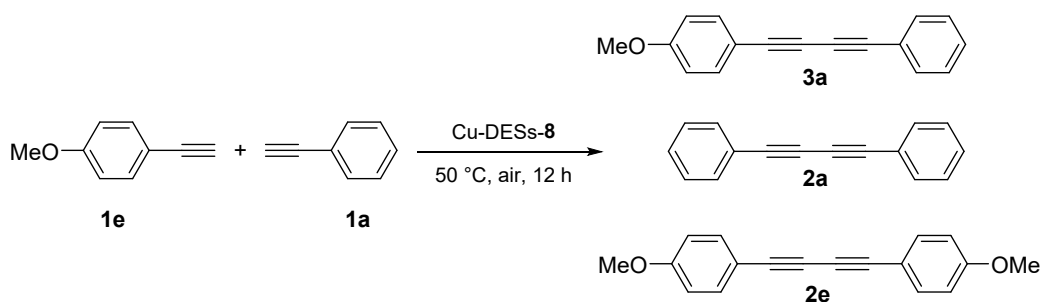

| Entry          | <b>1e</b><br>(mmol) | <b>1a</b><br>(mmol) | <b>3a</b><br>Yield (%) <sup>b</sup> | <b>2a</b><br>Yield (%) <sup>c</sup> | <b>2e</b><br>Yield (%) <sup>d</sup> |
|----------------|---------------------|---------------------|-------------------------------------|-------------------------------------|-------------------------------------|
| 1              | 0.1                 | 0.1                 | 41                                  | 53                                  | 43                                  |
| 2              | 0.1                 | 0.2                 | 54                                  | 65                                  | 36                                  |
| 3              | 0.1                 | 0.5                 | 66                                  | 74                                  | 28                                  |
| 4 <sup>e</sup> | 0.1                 | 0.5                 | 82                                  | 81                                  | 13                                  |

<sup>a</sup> The reaction was carried out using Cu-DESS-8 (0.6 mL) at 50 °C for 12 h in air; isolated yield.

<sup>b</sup> Yields based on **1e**. <sup>c</sup> Yields based on **1a**. <sup>d</sup> Yields based on **1e**. <sup>e</sup> Temperature is 70 °C.

### 3. Experimental procedures

#### 3.1 .General procedure for the synthesis of symmetric 1,3-diynes

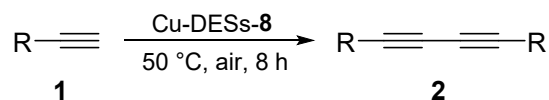

A dry schlenk tube (25 mL) with a magnetic rotor was charged with **1** (0.3 mmol) and Cu-DESS-**8** (0.6 mL). The mixture was stirred at 50 °C for 8 h in air. After the reaction completed, the reaction mixture was extracted with petroleum ether (3×5 mL). The combined organic layer was dried over Na<sub>2</sub>SO<sub>4</sub>, concentrated under reduced pressure to afford the desired products **2**. [**2i** and **2j** were purified by flash column chromatography on silica gel (petroleum ether/methylene dichloride =30:1)].

### 3.2 General procedure for the synthesis of unsymmetrical 1,3-diynes.

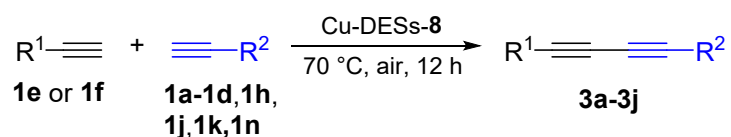

A dry schlenk tube (25 mL) with a magnetic rotor was charged with **1e/1f** (0.1 mmol), **1a-1d/1h/1j/1k/1n** (0.5 mmol) and Cu-DESS-**8** (0.6 mL). The mixture was stirred at 70 °C for 12 h in air. After the reaction completed, the reaction mixture was extracted with petroleum ether (3×5 mL). The combined organic layer was dried over Na<sub>2</sub>SO<sub>4</sub>, concentrated under reduced pressure. The residue was purified by flash column chromatography on silica gel (petroleum ether/methylene dichloride =40:1)] to afford **3a-3j**.

## 4. Characterization of products

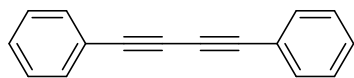

**2a**

**1,4-diphenyl buta-1,3-diyne (2a)**<sup>1</sup>: White solid; mp 85-86 °C; <sup>1</sup>H NMR (400 MHz, CDCl<sub>3</sub>): δ 7.59-7.56 (m, 4 H), 7.41-7.35 (m, 6 H); <sup>13</sup>C NMR (101 MHz, CDCl<sub>3</sub>): δ 132.5, 129.2, 128.4, 121.8, 81.6, 74.0.

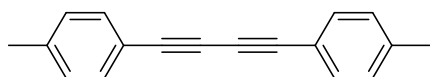

**2b**

**1,4-bis(p-methylphenyl)buta-1,3-diyne (2b)**<sup>1</sup>: White solid; mp 178-180 °C; <sup>1</sup>H NMR (400 MHz, CDCl<sub>3</sub>): δ 7.43 (d, *J* = 8.4 Hz, 4 H), 7.16 (d, *J* = 8.0 Hz, 4 H), 2.37 (s, 6 H); <sup>13</sup>C NMR (101 MHz, CDCl<sub>3</sub>): δ 139.5, 132.4, 129.2, 118.8, 81.6, 73.5, 21.6.

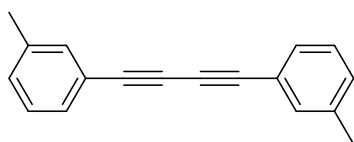

**2c**

**1,4-bis(m-methylphenyl)buta-1,3-diyne (2c)**<sup>1</sup>: White solid; mp 70-71 °C; <sup>1</sup>H NMR (400 MHz, CDCl<sub>3</sub>): δ 7.33-7.31 (m, 4 H), 7.22-7.15 (m, 4 H), 2.32 (s, 6 H); <sup>13</sup>C NMR (101 MHz, CDCl<sub>3</sub>): δ 138.2, 133.0, 130.2, 129.7, 128.4, 121.7, 81.7, 73.8, 21.2.

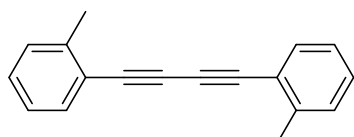

**2d**

**1,4-bis(o-methylphenyl)buta-1,3-diyne (2d)**<sup>2</sup>: White solid; mp 72-73 °C; <sup>1</sup>H NMR (400 MHz, CDCl<sub>3</sub>): δ 7.50 (d, *J* = 7.6 Hz, 2 H), 7.27-7.20 (m, 4 H), 7.15 (t, *J* = 7.4 Hz, 2 H), 2.49 (s, 6 H); <sup>13</sup>C NMR (101 MHz, CDCl<sub>3</sub>): δ 141.7, 132.9, 129.6, 129.1, 125.7, 121.8, 81.2, 77.6, 20.8.

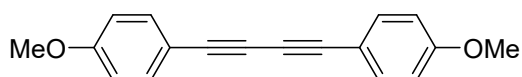

**2e**

**1,4-bis(p-methoxyphenyl)buta-1,3-diyne (2e)**<sup>1</sup>: White solid; mp 139-140 °C; <sup>1</sup>H NMR (400 MHz, CDCl<sub>3</sub>): δ 7.46 (d, *J* = 8.8 Hz, 4 H), 6.85 (d, *J* = 8.8 Hz, 4 H), 3.82

(s, 6 H);  $^{13}\text{C}$  NMR (101 MHz,  $\text{CDCl}_3$ ):  $\delta$  160.3, 134.1, 114.2, 114.0, 81.3, 73.0, 55.3.

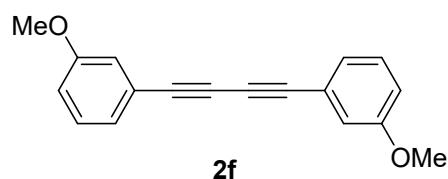

**1,4-bis(m-methoxyphenyl)buta-1,3-diyne (2f)**<sup>3</sup>: White solid; mp 96-97 °C;  $^1\text{H}$  NMR (400 MHz,  $\text{CDCl}_3$ ):  $\delta$  7.24 (d,  $J = 8.0$  Hz, 2 H), 7.12 (d,  $J = 8.0$  Hz, 2 H), 7.04 (s, 2 H), 6.92 (d,  $J = 8.0$  Hz, 2 H), 3.79 (s, 6 H);  $^{13}\text{C}$  NMR (101 MHz,  $\text{CDCl}_3$ ):  $\delta$  159.4, 129.6, 125.1, 122.7, 117.2, 116.1, 81.6, 73.7, 55.3.

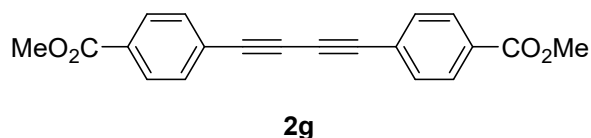

**1,4-bis(p-carbomethoxyphenyl)buta-1,3-diyne (2g)**<sup>4</sup>: White solid; mp 189-191 °C;  $^1\text{H}$  NMR (400 MHz,  $\text{CDCl}_3$ ):  $\delta$  8.02 (d,  $J = 8.4$  Hz, 4 H), 7.59 (d,  $J = 8.4$  Hz, 4 H), 3.93 (s, 6 H);  $^{13}\text{C}$  NMR (101 MHz,  $\text{CDCl}_3$ ):  $\delta$  166.3, 132.5, 130.6, 129.6, 126.1, 81.9, 76.3, 52.4.

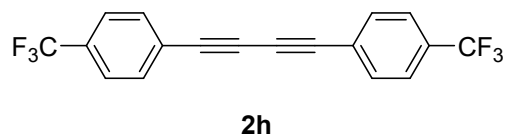

**1,4-bis(p-trifluoromethyl)buta-1,3-diyne (2h)**<sup>2</sup>: Yellow solid; mp 169-170 °C;  $^1\text{H}$  NMR (400 MHz,  $\text{CDCl}_3$ ):  $\delta$  7.66-7.60 (m, 8 H);  $^{13}\text{C}$  NMR (101 MHz,  $\text{CDCl}_3$ ):  $\delta$  132.8, 131.1 (q,  $J = 32.3$  Hz), 125.5 (q,  $J = 4.0$  Hz), 125.3, 123.7 (q,  $J = 272.7$  Hz), 81.0, 75.6.

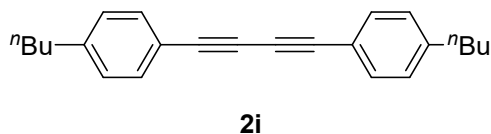

**1,4-bis(4-n-butylphenyl)buta-1,3-diyne (2i)**<sup>5</sup>: Yellow solid; mp 111-113 °C;  $^1\text{H}$  NMR (400 MHz,  $\text{CDCl}_3$ ):  $\delta$  7.44 (d,  $J = 8.0$  Hz, 4 H), 7.15 (d,  $J = 8.0$  Hz, 4 H), 2.62 (t,  $J = 7.6$  Hz, 4 H), 1.63-1.56 (m, 4 H), 1.40-1.31 (m, 4 H), 0.93 (t,  $J = 7.4$  Hz, 6 H);  $^{13}\text{C}$  NMR (101 MHz,  $\text{CDCl}_3$ ):  $\delta$  144.5, 132.4, 128.6, 119.0, 81.6, 73.5, 35.7, 33.3, 22.3, 13.9.

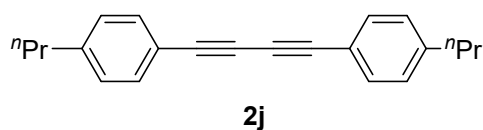

**1,4-bis(4-n-propylphenyl)buta-1,3-diyne (2j)**<sup>1</sup>: Yellow solid; mp 105-107 °C; <sup>1</sup>H NMR (400 MHz, CDCl<sub>3</sub>): δ 7.44 (d, *J* = 8.0 Hz, 4 H), 7.14 (d, *J* = 8.0 Hz, 4 H), 2.59 (t, *J* = 7.6 Hz, 4 H), 1.67-1.61 (m, 4 H), 0.94 (t, *J* = 7.4 Hz, 4 H); <sup>13</sup>C NMR (101 MHz, CDCl<sub>3</sub>): δ 144.3, 132.4, 128.6, 119.1, 81.6, 73.5, 38.1, 24.3, 13.8.

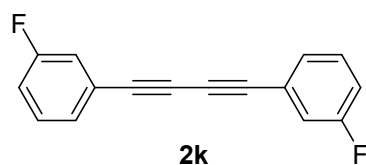

**1,4-bis(3-fluorophenyl)buta-1,3-diyne (2k)**<sup>6</sup>: White solid; mp 118-120 °C; <sup>1</sup>H NMR (400 MHz, CDCl<sub>3</sub>): δ 7.31-7.29 (m, 4 H), 7.21 (d, *J* = 7.2 Hz, 2 H), 7.11-7.06 (m, 2 H); <sup>13</sup>C NMR (101 MHz, CDCl<sub>3</sub>): δ 162.3 (d, *J* = 242.4 Hz), 130.1 (d, *J* = 9.1 Hz), 128.5 (d, *J* = 4.0 Hz), 123.4 (d, *J* = 10.1 Hz), 119.2 (d, *J* = 23.2 Hz), 116.9 (d, *J* = 21.2 Hz), 80.7 (d, *J* = 3.0 Hz), 74.5.

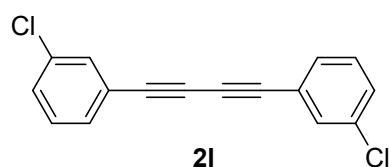

**1,4-bis(3-chlorophenyl)buta-1,3-diyne (2l)**<sup>6</sup>: White solid; mp 74-76 °C; <sup>1</sup>H NMR (400 MHz, CDCl<sub>3</sub>): δ 7.50-7.49 (m, 2 H), 7.41-7.39 (m, 2 H), 7.35 (ddd, *J* = 8.0, 2.4, 1.2 Hz, 2 H), 7.29-7.25 (m, 2 H); <sup>13</sup>C NMR (101 MHz, CDCl<sub>3</sub>): δ 134.4, 132.3, 130.7, 129.7, 123.3, 80.6, 74.7.

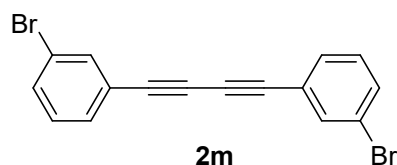

**1,4-bis(3-bromophenyl)buta-1,3-diyne (2m)**<sup>7</sup>: White solid; mp 95-97 °C; <sup>1</sup>H NMR (400 MHz, CDCl<sub>3</sub>): δ 7.67-7.66 (m, 2 H), 7.51 (ddd, *J* = 8.0, 2.0, 1.2 Hz, 2 H), 7.46-7.44 (m, 2 H), 7.23-7.20 (m, 2 H); <sup>13</sup>C NMR (101 MHz, CDCl<sub>3</sub>): δ 135.2, 132.6, 131.1, 129.9, 123.6, 122.3, 80.5, 74.8.

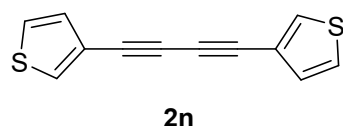

**1,4-bis(3-thienyl)buta-1,3-diyne (2n)**<sup>5</sup>: White solid; mp 110-112 °C; <sup>1</sup>H NMR (400 MHz, CDCl<sub>3</sub>): δ 7.59 (dd, *J* = 3.2, 1.2 Hz, 2 H), 7.28 (dd, *J* = 5.2, 3.0 Hz, 2 H), 7.17 (dd, *J* = 4.8, 1.2 Hz, 2 H); <sup>13</sup>C NMR (101 MHz, CDCl<sub>3</sub>): δ 131.2, 130.2, 125.6, 120.9,

76.6, 73.6.

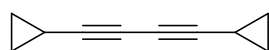

**2o**

**1,4-dicyclopropylbuta-1,3-diyne (2o)**<sup>2</sup>: Colorless oil; <sup>1</sup>H NMR (400 MHz, CDCl<sub>3</sub>):  $\delta$  1.31-1.25 (m, 2 H), 0.79-0.71 (m, 8 H); <sup>13</sup>C NMR (101 MHz, CDCl<sub>3</sub>):  $\delta$  80.1, 60.8, 8.7, 0.1.

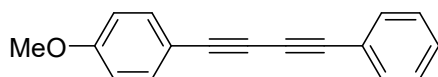

**3a**

**1-methoxy-4-(phenylbuta-1,3-diyne-1-yl) benzene (3a)**<sup>1</sup>: White solid; mp 97-98 °C; <sup>1</sup>H NMR (400 MHz, CDCl<sub>3</sub>):  $\delta$  7.52 (d,  $J$  = 7.6 Hz, 2 H), 7.47 (d,  $J$  = 8.8 Hz, 2 H), 7.37-7.31 (m, 3 H), 6.86 (d,  $J$  = 8.4 Hz, 2 H), 3.83 (s, 3 H); <sup>13</sup>C NMR (101 MHz, CDCl<sub>3</sub>):  $\delta$  160.4, 134.2, 132.5, 129.0, 128.4, 122.0, 114.2, 113.7, 81.8, 81.0, 74.2, 72.8, 55.4.

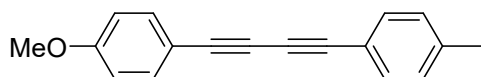

**3b**

**1-((4-methoxyphenyl)buta-1,3-diyne-1-yl)-4-methylbenzene (3b)**<sup>1</sup>: White solid; mp 141-143 °C; <sup>1</sup>H NMR (400 MHz, CDCl<sub>3</sub>):  $\delta$  7.47 (d,  $J$  = 8.8 Hz, 2 H), 7.41 (d,  $J$  = 8.4 Hz, 2 H), 7.14 (d,  $J$  = 8.4 Hz, 2 H), 6.86 (d,  $J$  = 8.8 Hz, 2 H), 3.82 (s, 3 H), 2.37 (s, 3 H); <sup>13</sup>C NMR (101 MHz, CDCl<sub>3</sub>):  $\delta$  160.3, 139.4, 134.1, 132.4, 129.2, 118.9, 114.2, 113.9, 81.5, 81.3, 73.6, 72.9, 55.4, 21.6.

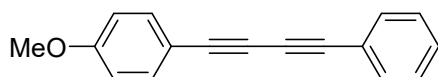

**3c**

**1-(4-methoxyphenyl)-4-(*m*-toluenyl)buta-1,3-diyne (3c)**<sup>1</sup>: White solid; mp 63-64 °C; <sup>1</sup>H NMR (400 MHz, CDCl<sub>3</sub>):  $\delta$  7.47 (d,  $J$  = 8.8 Hz, 2 H), 7.34-7.31 (m, 2 H), 7.24-7.16 (m, 2 H), 6.86 (d,  $J$  = 8.8 Hz, 2 H), 3.82 (s, 3 H), 2.33 (s, 3 H); <sup>13</sup>C NMR (101 MHz, CDCl<sub>3</sub>):  $\delta$  160.4, 138.2, 134.1, 133.0, 130.0, 129.6, 128.3, 121.8, 114.2, 113.8, 81.6, 81.3, 73.8, 72.8, 55.4, 21.2.

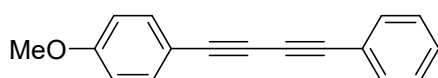

**3d**

**1-(4-methoxyphenyl)-4-(*o*-toluenyl)buta-1,3-diyne (3d)**<sup>8</sup>: White solid; mp 62-64 °C;



$^1\text{H NMR}$  (400 MHz,  $\text{CDCl}_3$ ):  $\delta$  7.48 (d,  $J = 8.0$  Hz, 3 H), 7.27-7.13 (m, 3 H), 6.86 (d,  $J = 8.0$  Hz, 2 H), 3.83 (s, 3 H), 2.49 (s, 3 H);  $^{13}\text{C NMR}$  (101 MHz,  $\text{CDCl}_3$ ):  $\delta$  160.3, 141.6, 134.1, 132.9, 129.6, 129.0, 125.7, 121.8, 114.2, 113.8, 82.3, 80.1, 77.7, 72.8, 55.4, 20.8.

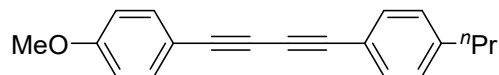

**3e**

**1-Propyl-4-((4-methoxyphenyl)buta-1,3-diynyl)benzene (3e)**<sup>1</sup>: Yellow solid; mp 90-92 °C;  $^1\text{H NMR}$  (400 MHz,  $\text{CDCl}_3$ ):  $\delta$  7.48-7.42 (m, 4 H), 7.14 (d,  $J = 7.6$  Hz, 2 H), 6.86 (d,  $J = 8.4$  Hz, 2 H), 3.83 (s, 3 H), 2.59 (t,  $J = 7.6$  Hz, 2 H), 1.66-1.61 (m, 2 H), 0.94 (t,  $J = 7.6$  Hz, 3 H);  $^{13}\text{C NMR}$  (101 MHz,  $\text{CDCl}_3$ ):  $\delta$  160.3, 144.2, 134.1, 132.4, 128.6, 119.1, 114.2, 113.9, 81.5, 81.4, 73.5, 72.9, 55.4, 38.1, 24.3, 13.8.

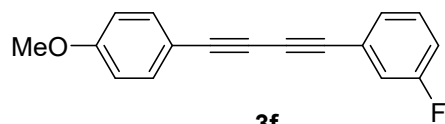

**3f**

**1-fluoro-3-((4-methoxyphenyl)buta-1,3-diyn-1-yl)benzene (3f)**<sup>9</sup>: Yellow solid; mp 61-62 °C;  $^1\text{H NMR}$  (400 MHz,  $\text{CDCl}_3$ ):  $\delta$  7.48 (d,  $J = 8.8$  Hz, 2 H), 7.31-7.30 (m, 2 H), 7.20 (d,  $J = 8.8$  Hz, 1 H), 7.09-7.04 (m, 1 H), 6.87 (d,  $J = 8.4$  Hz, 2 H), 3.83 (s, 3 H);  $^{13}\text{C NMR}$  (101 MHz,  $\text{CDCl}_3$ ):  $\delta$  162.3 (d,  $J = 245.8$  Hz) 160.5, 134.2, 130.1 (d,  $J = 8.1$  Hz), 128.4 (d,  $J = 3.0$  Hz), 123.9 (d,  $J = 9.1$  Hz), 119.2, 119.0, 116.4, 114.2, 113.4, 82.5, 79.6, 75.1, 72.4, 55.4.

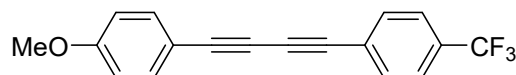

**3g**

**1-(4-methoxyphenyl)-4-(4-trifluorophenyl)buta-1,3-diyne (3g)**<sup>1</sup>: Yellow solid; mp 142-143 °C;  $^1\text{H NMR}$  (400 MHz,  $\text{CDCl}_3$ ):  $\delta$  7.63-7.57 (m, 4 H), 7.49 (d,  $J = 8.8$  Hz, 2 H), 6.87 (d,  $J = 8.8$  Hz, 2 H), 3.83 (s, 3 H);  $^{13}\text{C NMR}$  (101 MHz,  $\text{CDCl}_3$ ):  $\delta$  160.7, 134.3, 132.6, 130.6 (q,  $J = 33.3$  Hz), 126.0, 125.4 (q,  $J = 4.0$  Hz), 123.8 (q,  $J = 272.7$  Hz), 114.3, 113.3, 83.2, 79.3, 76.6, 72.3, 55.4.

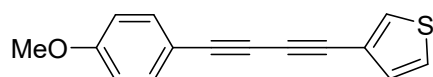

**3h**

**3-((4-methoxyphenyl)buta-1,3-diyn-1-yl)thiophene (3h)**<sup>8</sup>: Yellow solid; mp 84-86 °C;  $^1\text{H NMR}$  (400 MHz,  $\text{CDCl}_3$ ):  $\delta$  7.57 (dd,  $J = 3.2, 1.2$  Hz, 1 H), 7.46 (d,  $J = 9.2$  Hz,

2 H), 7.27 (dd,  $J = 4.8, 2.8$  Hz, 1 H), 7.17 (dd,  $J = 5.2, 1.2$  Hz, 1 H), 6.85 (d,  $J = 9.2$  Hz, 2 H), 3.82 (s, 3 H);  $^{13}\text{C}$  NMR (101 MHz,  $\text{CDCl}_3$ ):  $\delta$  160.4, 134.1, 131.0, 130.2, 125.5, 121.1, 114.2, 113.7, 81.6, 76.2, 73.8, 72.7, 55.4.

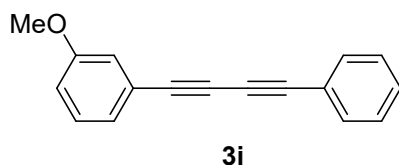

**1-methoxy-3-(phenylbuta-1,3-diyne-1-yl)benzene (3i)**<sup>9</sup>: White solid; mp 61-62 °C;  $^1\text{H}$  NMR (400 MHz,  $\text{CDCl}_3$ ):  $\delta$  7.54-7.52 (m, 2 H), 7.38-7.31 (m, 3 H), 7.26-7.22 (m, 1 H), 7.13 (d,  $J = 7.6$  Hz, 1 H), 7.05 (s, 1 H), 6.94-6.92 (m, 1 H); 3.81 (s, 3 H);  $^{13}\text{C}$  NMR (101 MHz,  $\text{CDCl}_3$ ):  $\delta$  159.3, 132.5, 129.6, 129.2, 128.5, 125.1, 122.8, 121.8, 117.1, 116.1, 81.6, 81.5, 73.9, 73.7, 55.3.

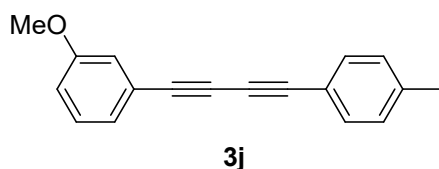

**1-methoxy-3-(p-tolylbuta-1,3-diyne-1-yl)benzene (3j)**<sup>9</sup>: White solid; mp 76-78 °C;  $^1\text{H}$  NMR (400 MHz,  $\text{CDCl}_3$ ):  $\delta$  7.42 (d,  $J = 8.0$  Hz, 2 H), 7.23 (d,  $J = 8.0$  Hz, 1 H), 7.15-7.11 (m, 3 H), 7.04 (s, 1 H), 6.92 (ddd,  $J = 8.0, 2.4, 1.2$  Hz, 1 H), 3.80 (s, 3 H), 2.37 (s, 3 H);  $^{13}\text{C}$  NMR (101 MHz,  $\text{CDCl}_3$ ):  $\delta$  159.3, 139.7, 132.5, 129.5, 129.3, 125.1, 122.9, 118.7, 117.1, 116.0, 81.9, 81.2, 73.9, 73.3, 55.3, 21.6.

## 5. References

1. H. Xu, K. Wu, J. Tian, L. Zhu and X. Yao, *Green Chem.*, **2018**, *20*, 793–797.
2. S. Tang, L. Li, X. Ren, J. Li, G. Yang, H. Li and B. Yuan, *Green Chem.*, **2019**, *21*, 2899–2904.
3. L. Feng, T. Hu, S. Zhang, H.-Y. Xiong and G. Zhang, *Org. Lett.*, **2019**, *21*, 9487–9492.
4. H. Xu, L. Wu, J. Tian, J. Wang, P. Wang, X. Niu and X. Yao, *Eur. J. Org. Chem.*, **2019**, *39*, 6690–6696.
5. W.-B. Sheng, T.-Q. Chen, M.-Z. Zhang, M. Tian, G.-F. Jiang and C.-C. Guo, *Tetrahedron Lett.*, **2016**, *57*, 1641–1643.
6. X. Ye, P. Zhao and X. Shi, *Angew. Chem.*, **2019**, *58*, 17226–17230.
7. K. Li, K. Wu, Y. Lu, J. Guo, P. Hu and C. Su, *Angew. Chem. Int. Ed.*, **2022**, *61*, art. no. E202114070.
8. M. Yu, D. Pan, W. Jia, W. Chen and N. Jiao, *Tetrahedron Lett.*, **2010**, *51*, 1287–1290.

9. Y. Liu, P. Liu, N. Gu, J. Xie, Y. Liu and B. Dai, *Chinese Journal of Chemistry*, **2016**, *34*, 895 - 900.

## 6. NMR Spectra

$^1\text{H}$  NMR, 400 MHz,  $\text{CDCl}_3$

7.587  
7.583  
7.568  
7.563  
7.406  
7.389  
7.386  
7.368  
7.352  
7.345

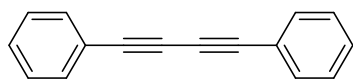

**2a**

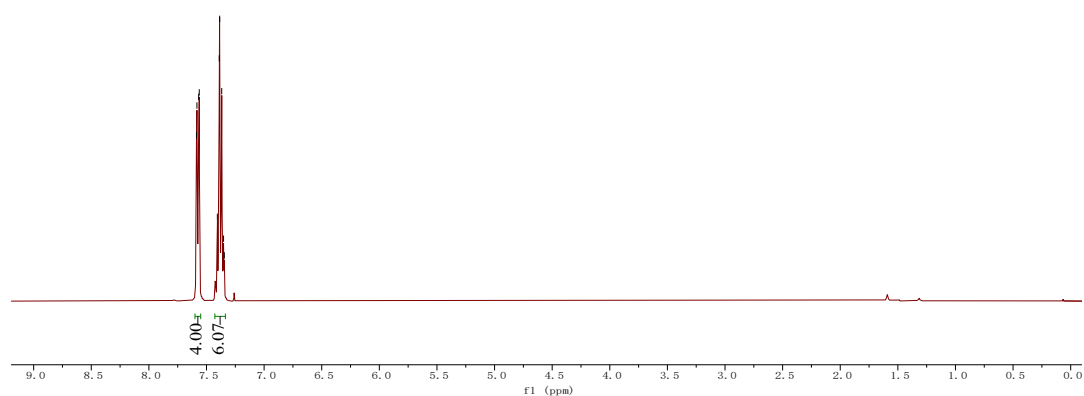

$^{13}\text{C}$  NMR, 101 MHz,  $\text{CDCl}_3$

132.49  
129.19  
128.43  
121.81

81.58  
77.34  
77.02  
76.70  
73.96

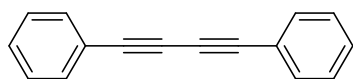

**2a**

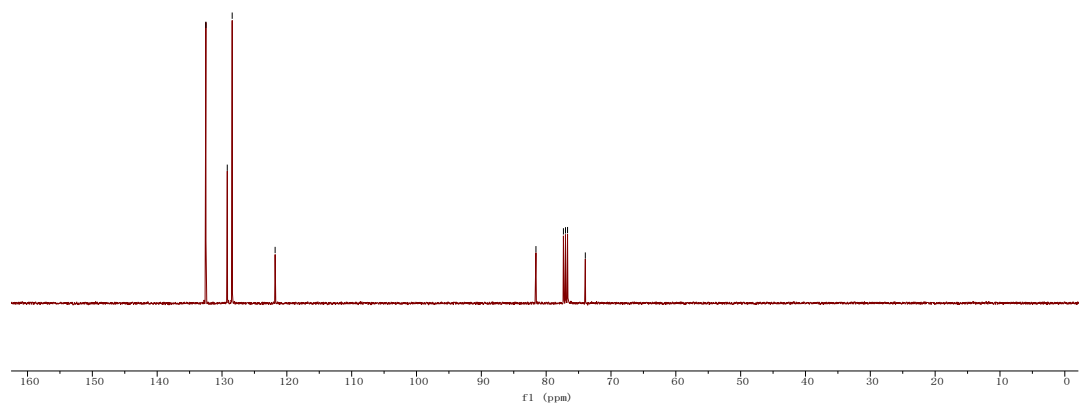

$^1\text{H}$  NMR, 400 MHz,  $\text{CDCl}_3$

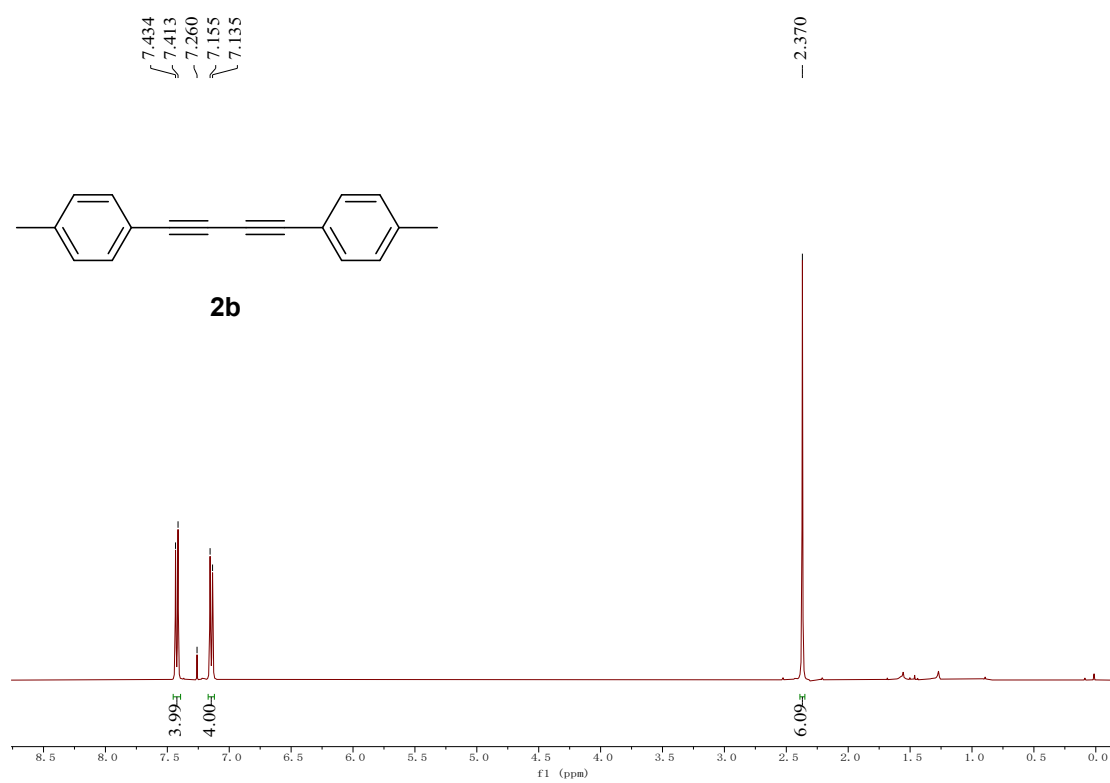

$^{13}\text{C}$  NMR, 101 MHz,  $\text{CDCl}_3$

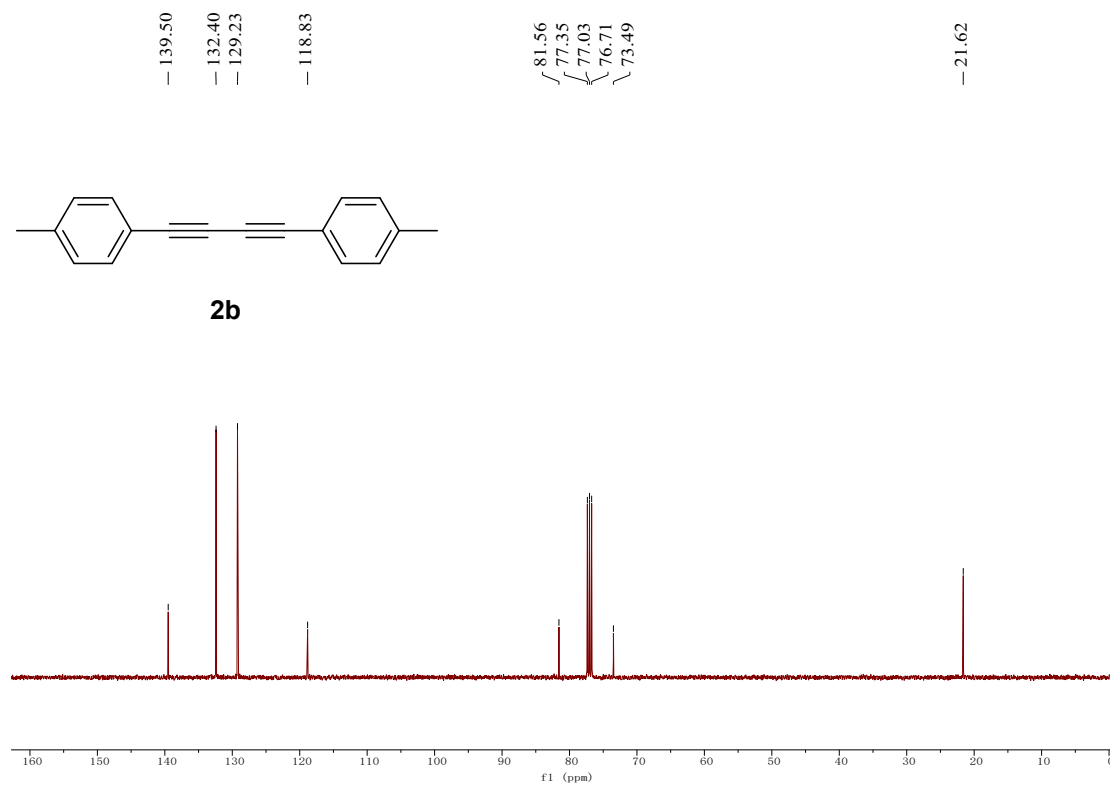

$^1\text{H}$  NMR, 400 MHz,  $\text{CDCl}_3$

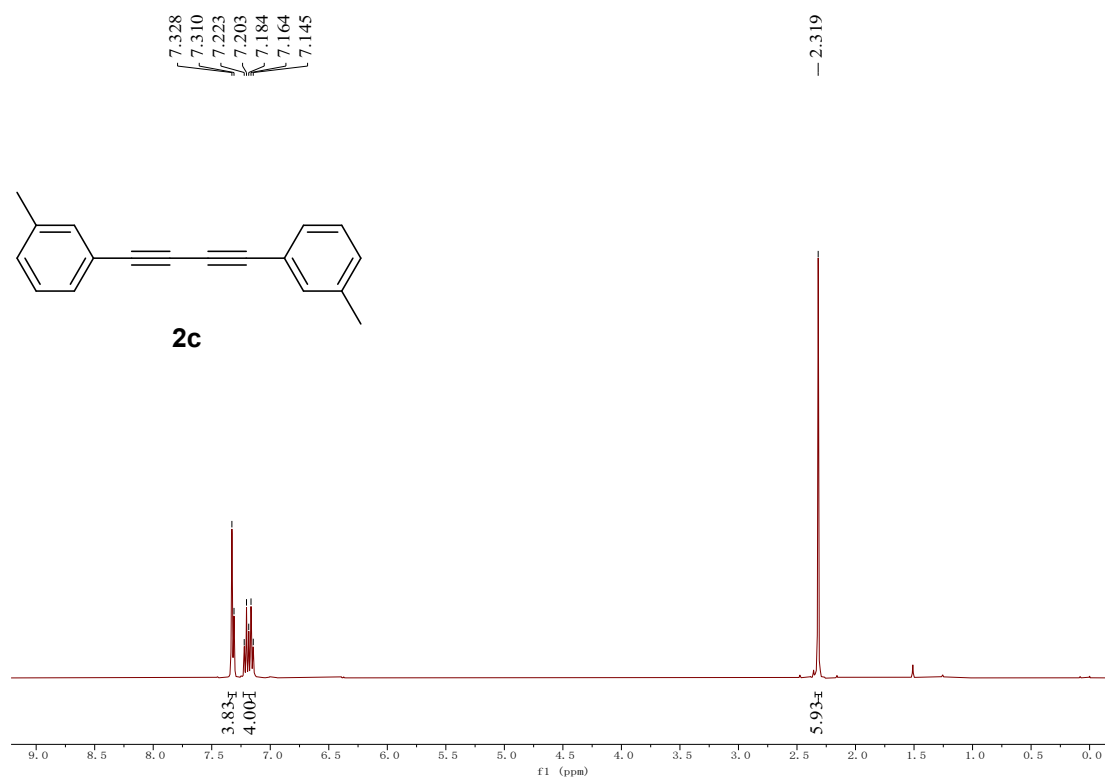

$^{13}\text{C}$  NMR, 101 MHz,  $\text{CDCl}_3$

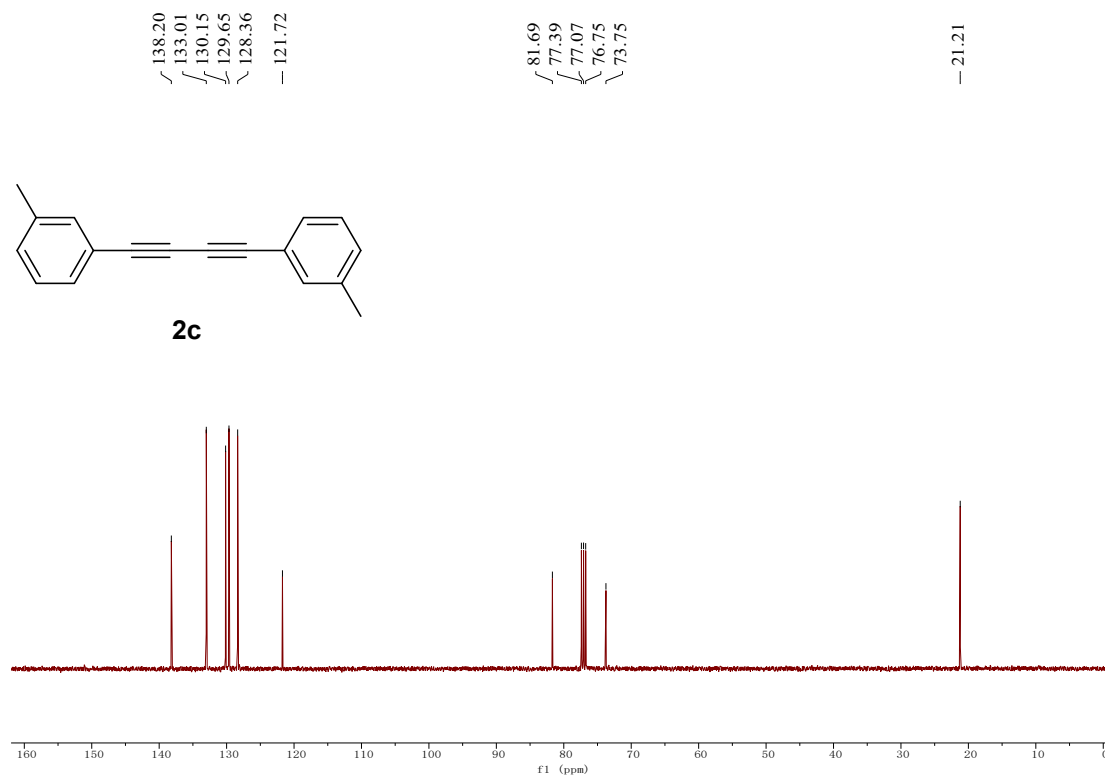

$^1\text{H}$  NMR, 400 MHz,  $\text{CDCl}_3$

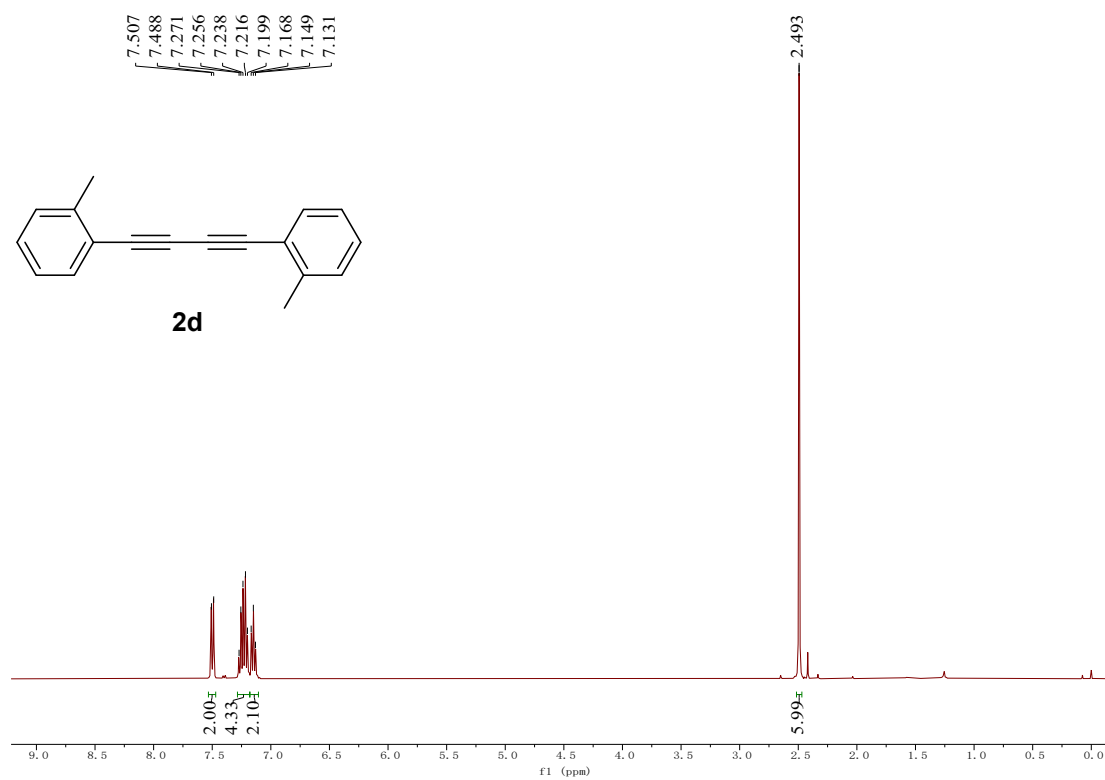

$^{13}\text{C}$  NMR, 101 MHz,  $\text{CDCl}_3$

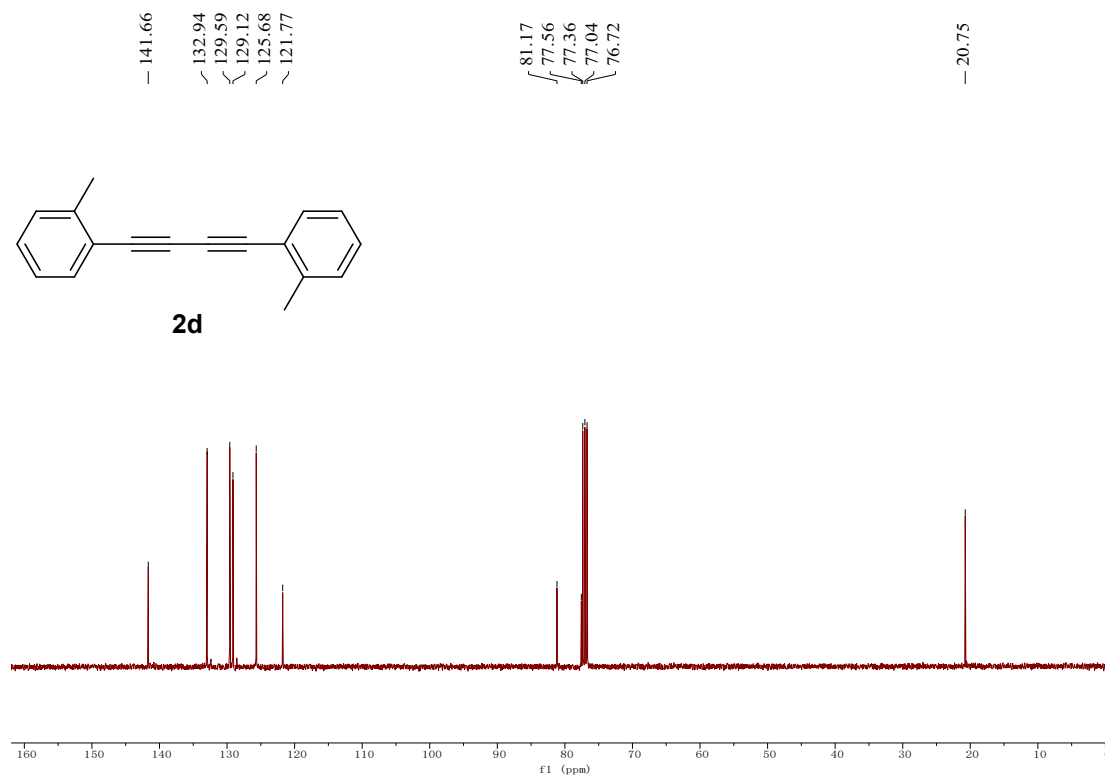

$^1\text{H}$  NMR, 400 MHz,  $\text{CDCl}_3$

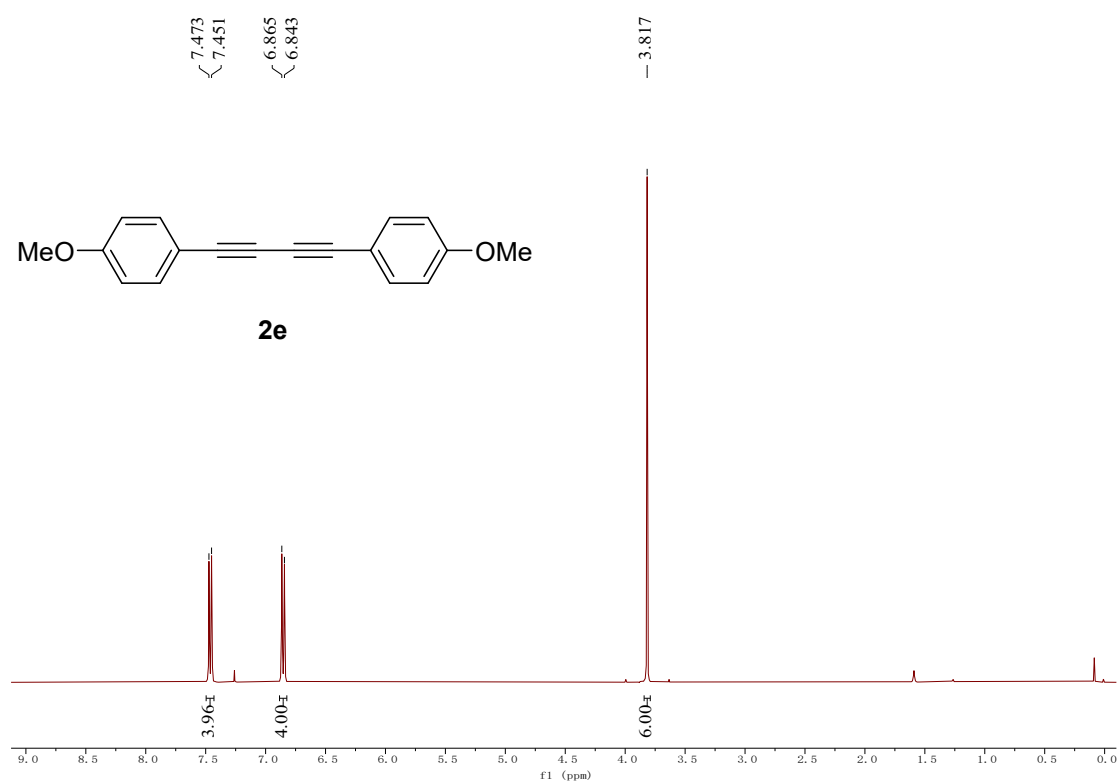

$^{13}\text{C}$  NMR, 101 MHz,  $\text{CDCl}_3$

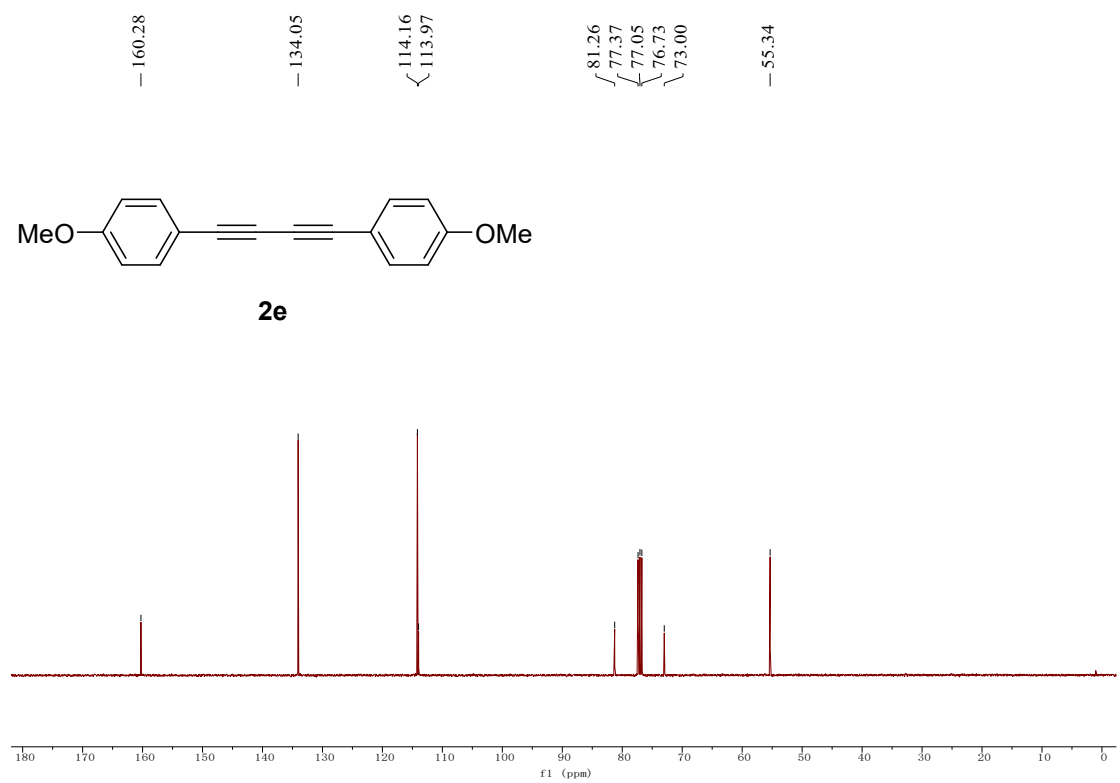



$^1\text{H}$  NMR, 400 MHz,  $\text{CDCl}_3$

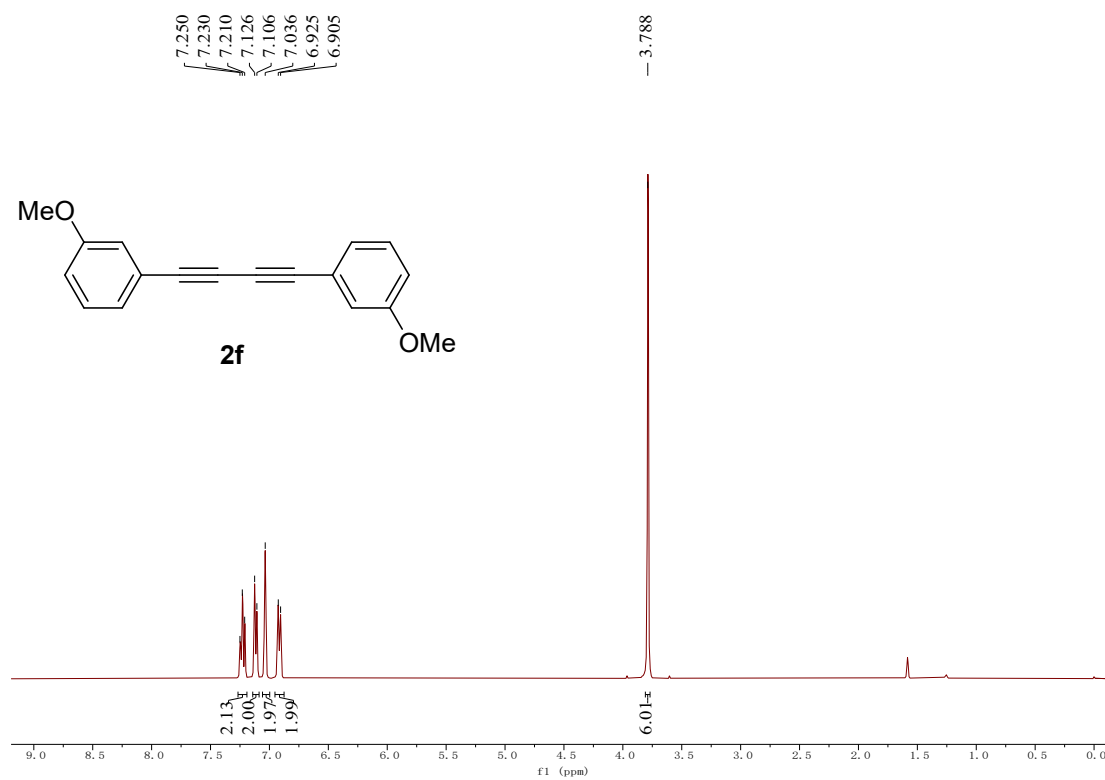

$^{13}\text{C}$  NMR, 101 MHz,  $\text{CDCl}_3$

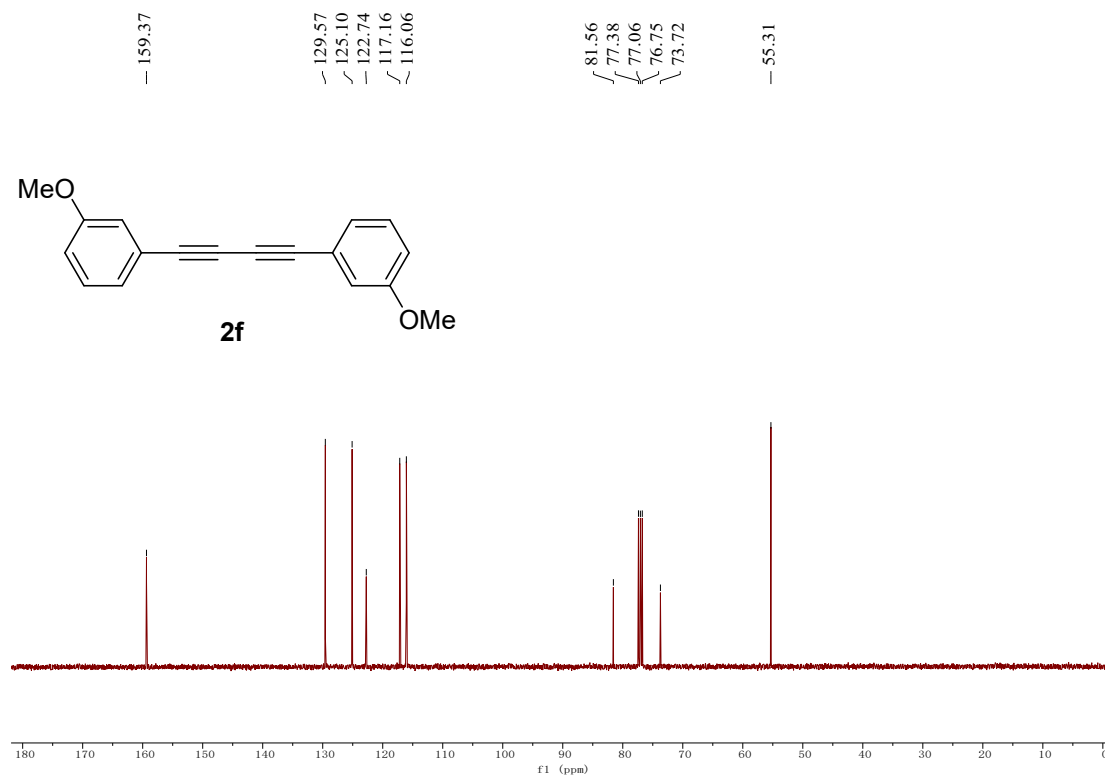

$^1\text{H}$  NMR, 400 MHz,  $\text{CDCl}_3$

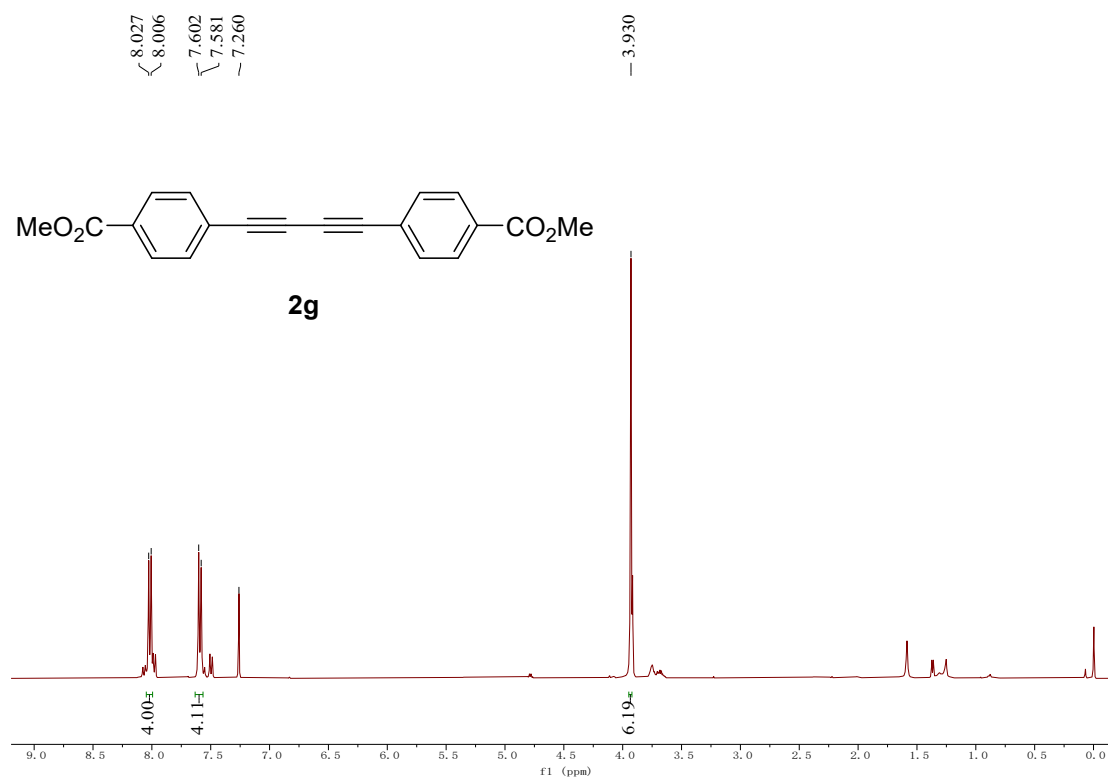

$^{13}\text{C}$  NMR, 101 MHz,  $\text{CDCl}_3$

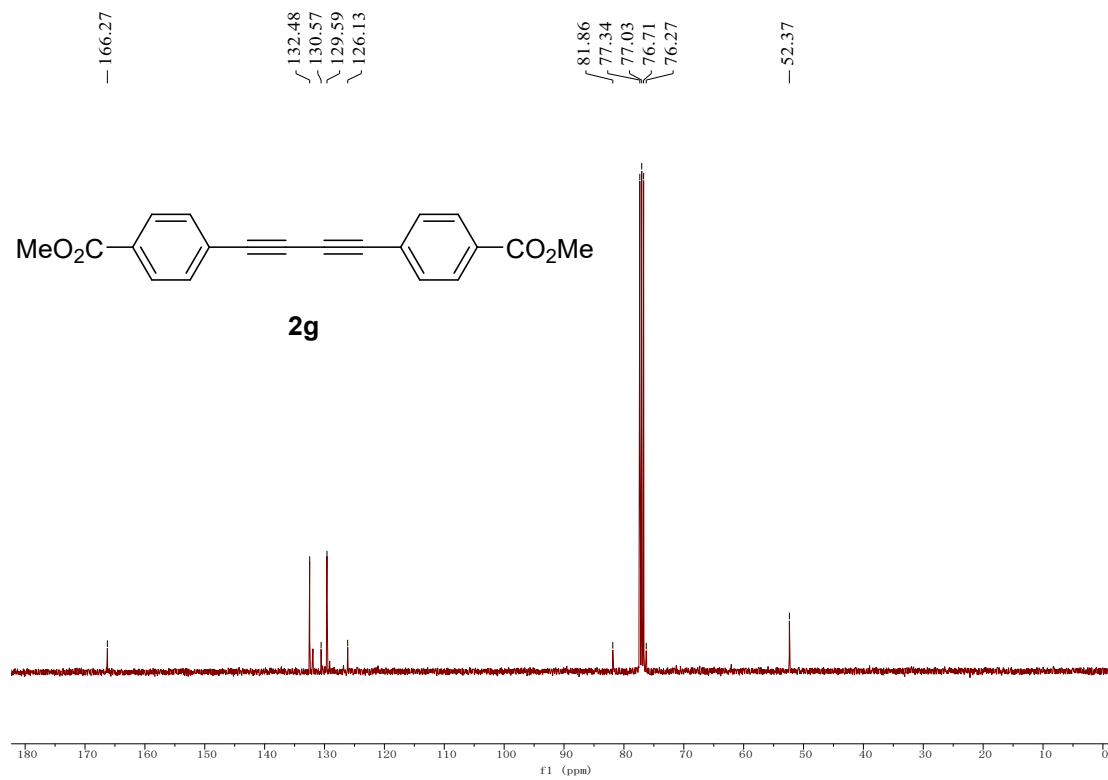

$^1\text{H}$  NMR, 400 MHz,  $\text{CDCl}_3$

7.655  
7.634  
7.623  
7.602  
7.260

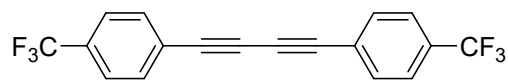

**2h**

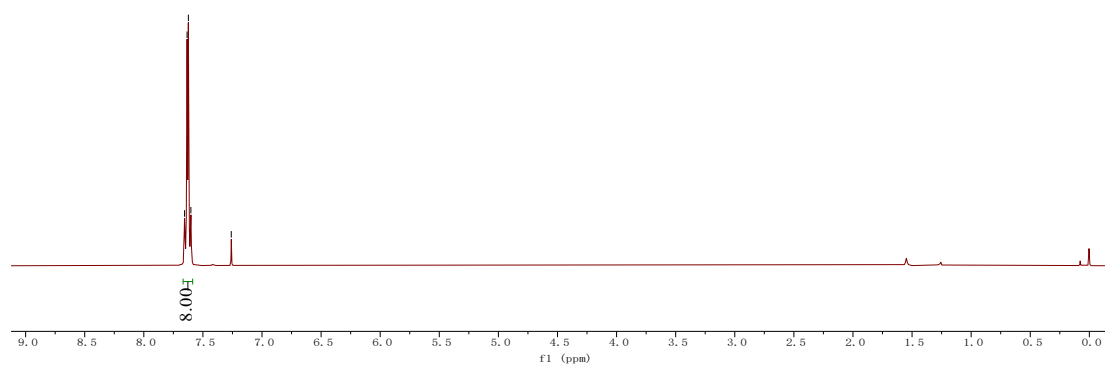

$^{13}\text{C}$  NMR, 101 MHz,  $\text{CDCl}_3$

132.81  
131.61  
131.29  
130.96  
130.63  
127.75  
125.52  
125.48  
125.44  
125.40  
125.28  
125.05  
122.34  
119.64  
80.97  
77.32  
77.01  
76.69  
75.64

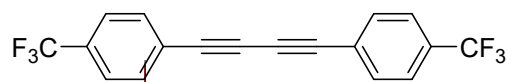

**2h**

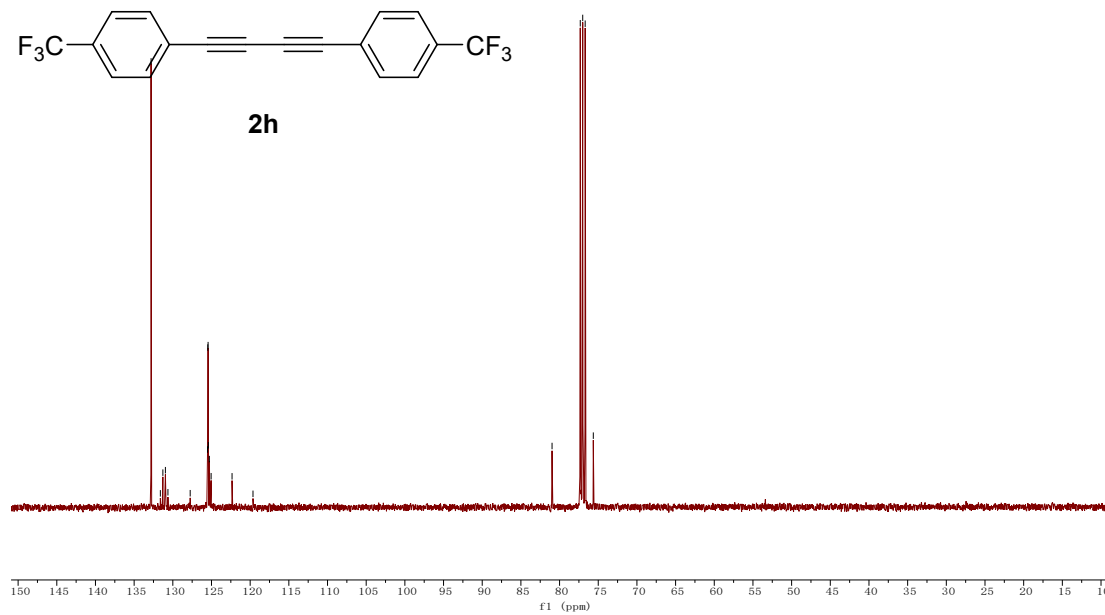

$^1\text{H}$  NMR, 400 MHz,  $\text{CDCl}_3$

7.447  
7.427  
7.260  
7.156  
7.136

2.636  
2.617  
2.598  
1.632  
1.613  
1.594  
1.575  
1.556  
1.399  
1.380  
1.362  
1.343  
1.324  
1.306  
0.948  
0.930  
0.911

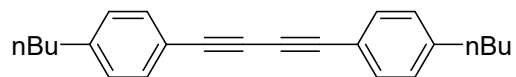

**2i**

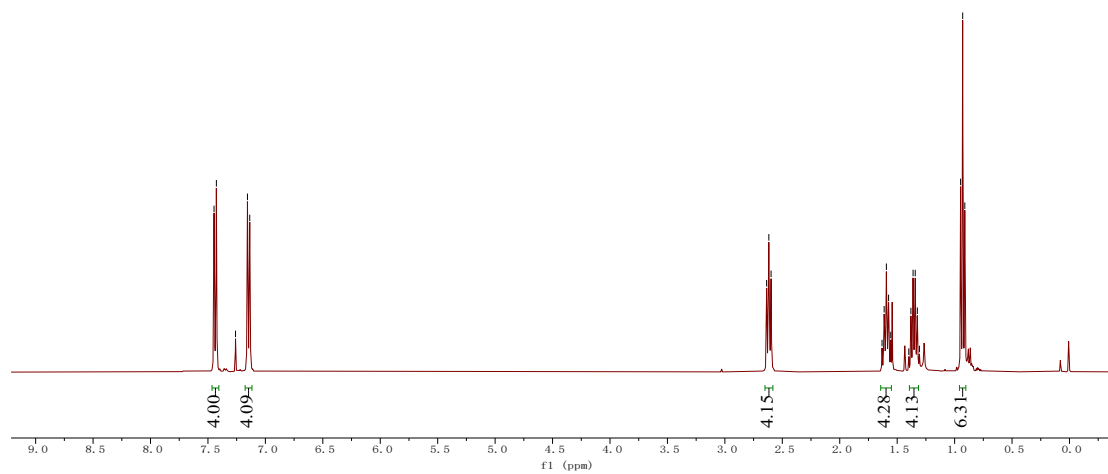

$^{13}\text{C}$  NMR, 101 MHz,  $\text{CDCl}_3$

144.48  
132.42  
128.58  
119.00

81.59  
77.35  
77.03  
76.71  
73.48

35.70  
33.32  
22.32  
13.93

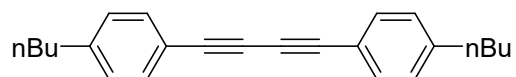

**2i**

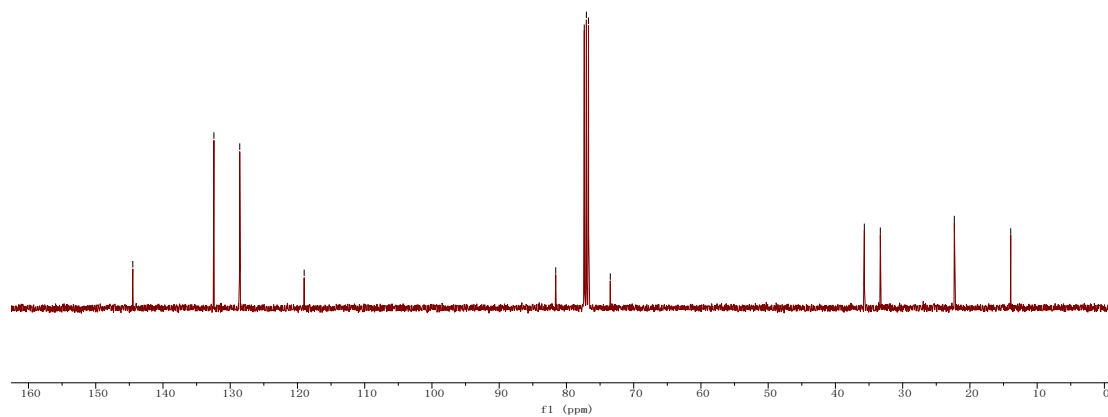

$^1\text{H}$  NMR, 400 MHz,  $\text{CDCl}_3$

7.449  
7.429  
7.260  
7.154  
7.134

2.612  
2.594  
2.574

1.666  
1.648  
1.628  
1.610

0.957  
0.939  
0.920

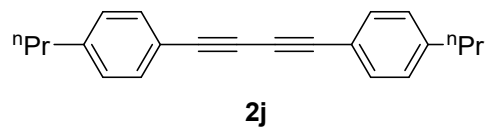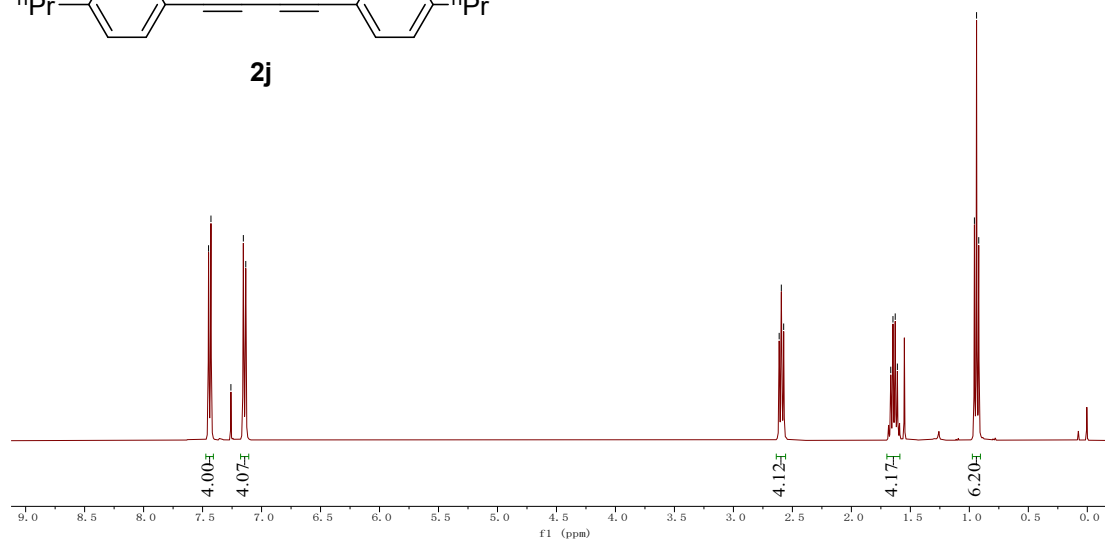

$^{13}\text{C}$  NMR, 101 MHz,  $\text{CDCl}_3$

144.25  
132.41  
128.63  
119.05

81.59  
77.35  
77.03  
76.71  
73.48

38.06

24.28

13.77

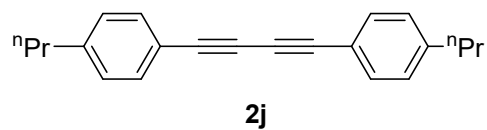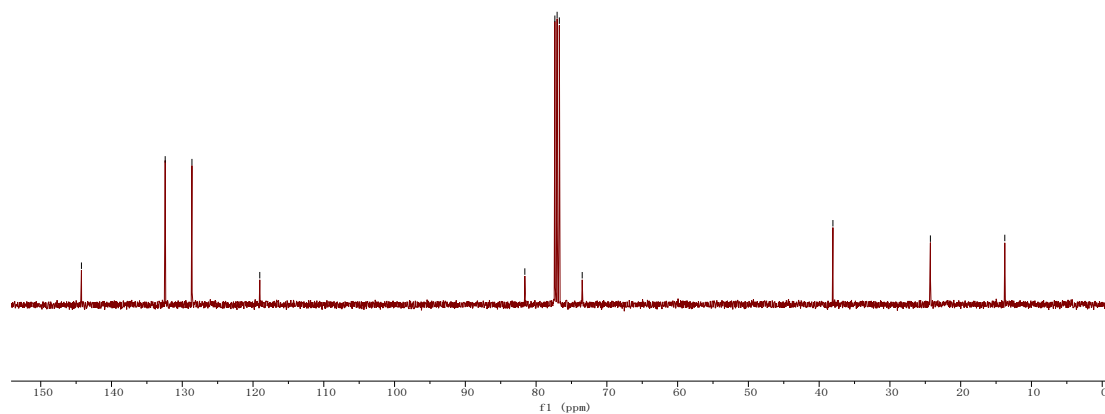

$^1\text{H}$  NMR, 400 MHz,  $\text{CDCl}_3$

7.313  
7.304  
7.299  
7.288  
7.216  
7.198  
7.107  
7.100  
7.095  
7.085  
7.078  
7.070  
7.062  
7.055

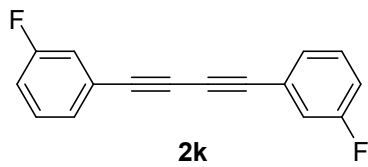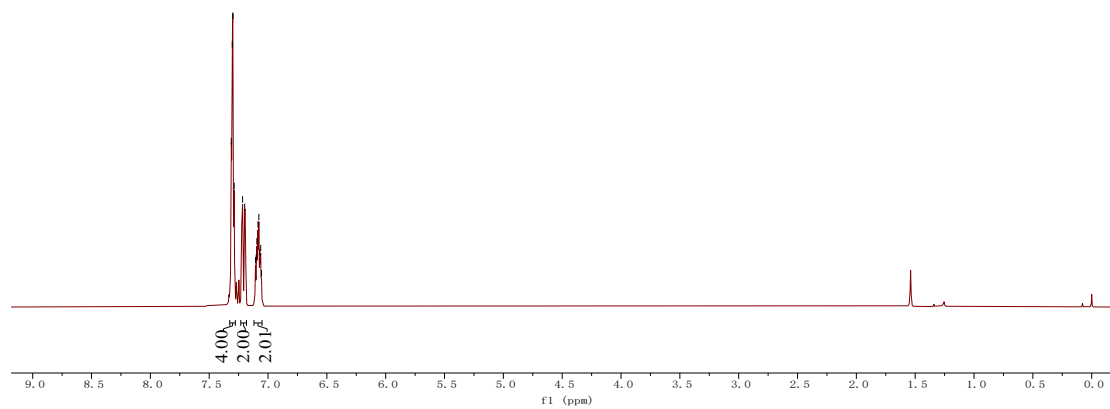

$^{13}\text{C}$  NMR, 101 MHz,  $\text{CDCl}_3$

163.53  
161.07  
130.18  
130.09  
128.50  
128.46  
123.48  
123.38  
119.35  
119.12  
117.01  
116.80  
80.68  
80.65  
77.34  
77.02  
76.70  
74.46

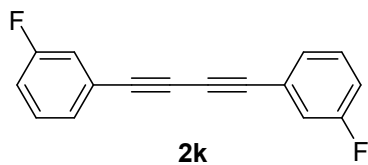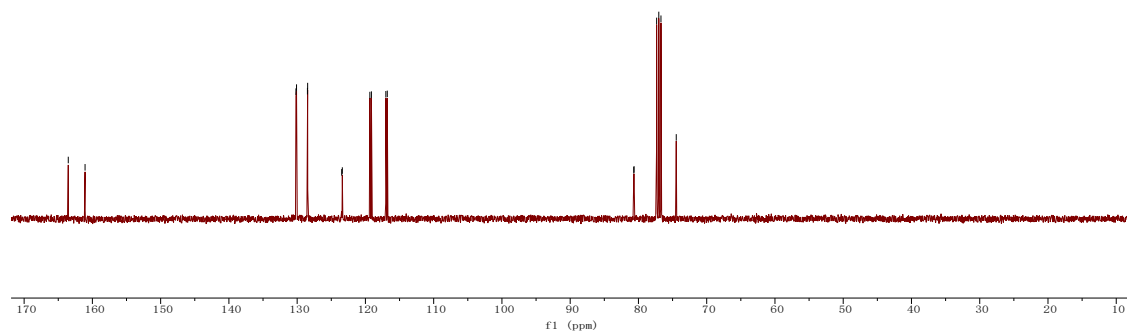

<sup>1</sup>H NMR, 400 MHz, CDCl<sub>3</sub>

7.503  
7.499  
7.494  
7.412  
7.409  
7.405  
7.393  
7.390  
7.386  
7.365  
7.362  
7.359  
7.356  
7.344  
7.342  
7.339  
7.336  
7.285  
7.265  
7.252  
7.245

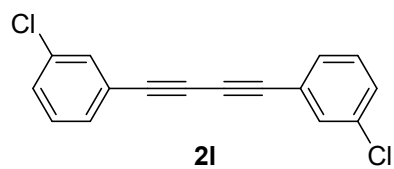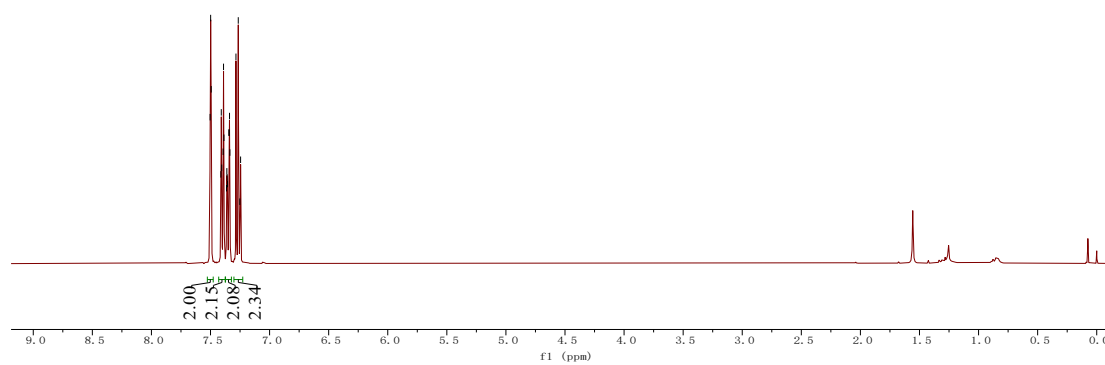

<sup>13</sup>C NMR, 101 MHz, CDCl<sub>3</sub>

134.39  
132.28  
130.67  
129.73  
123.31

80.59  
77.35  
77.03  
76.72  
74.73

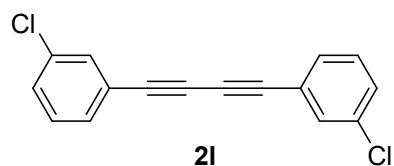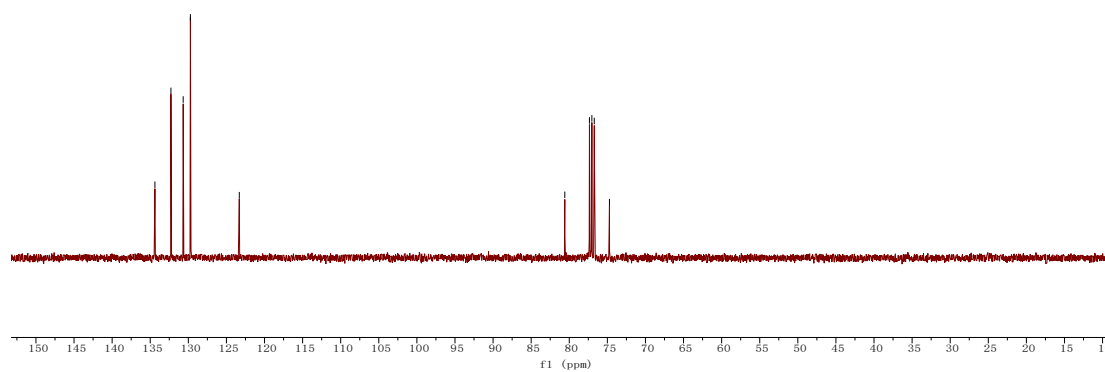

$^1\text{H}$  NMR, 400 MHz,  $\text{CDCl}_3$

7.672  
7.667  
7.663  
7.526  
7.523  
7.521  
7.518  
7.506  
7.503  
7.501  
7.498  
7.464  
7.461  
7.457  
7.445  
7.441  
7.438  
7.260  
7.231  
7.212  
7.192

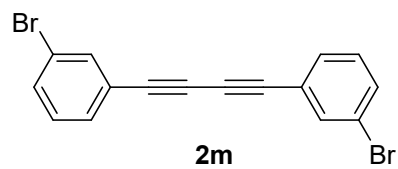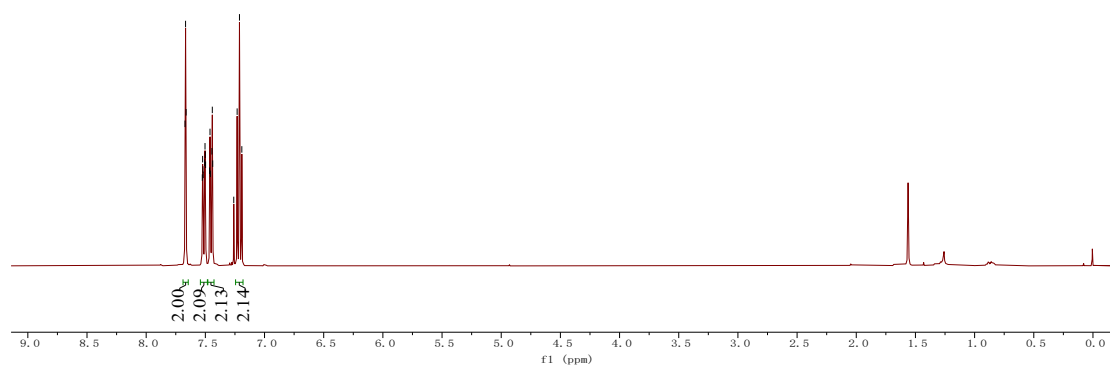

$^{13}\text{C}$  NMR, 101 MHz,  $\text{CDCl}_3$

135.15  
132.61  
131.10  
129.91  
123.59  
122.28  
80.51  
77.35  
77.03  
76.72  
74.83

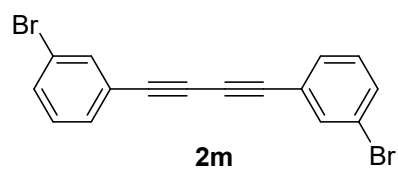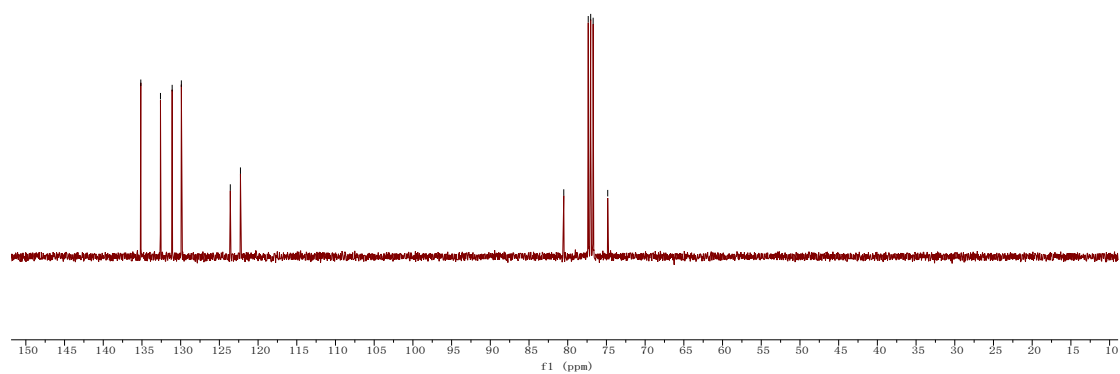



$^1\text{H}$  NMR, 400 MHz,  $\text{CDCl}_3$

7.595  
7.592  
7.587  
7.584  
7.293  
7.285  
7.280  
7.273  
7.260  
7.181  
7.178  
7.169  
7.166

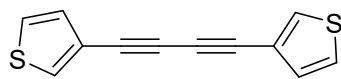

**2n**

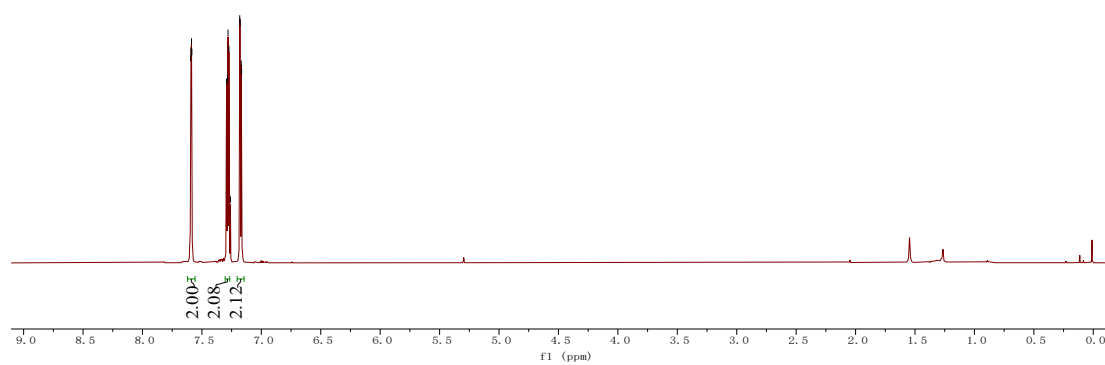

$^{13}\text{C}$  NMR, 101 MHz,  $\text{CDCl}_3$

131.24  
130.18  
125.61  
120.93

77.36  
77.04  
76.72  
76.59  
73.56

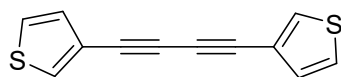

**2n**

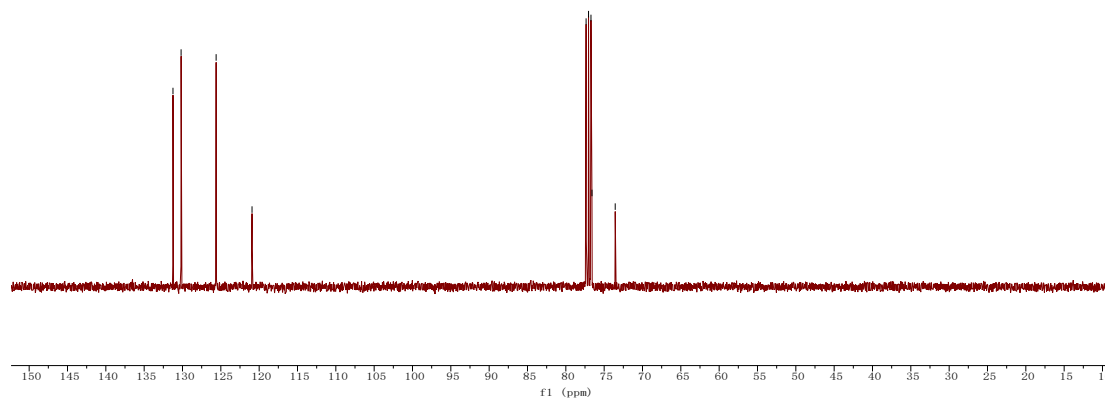

$^1\text{H}$  NMR, 400 MHz,  $\text{CDCl}_3$

1.312  
1.299  
1.290  
1.277  
1.266  
1.258  
1.246  
0.809  
0.790  
0.780  
0.770  
0.762  
0.751  
0.737  
0.729  
0.709

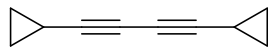

**2o**

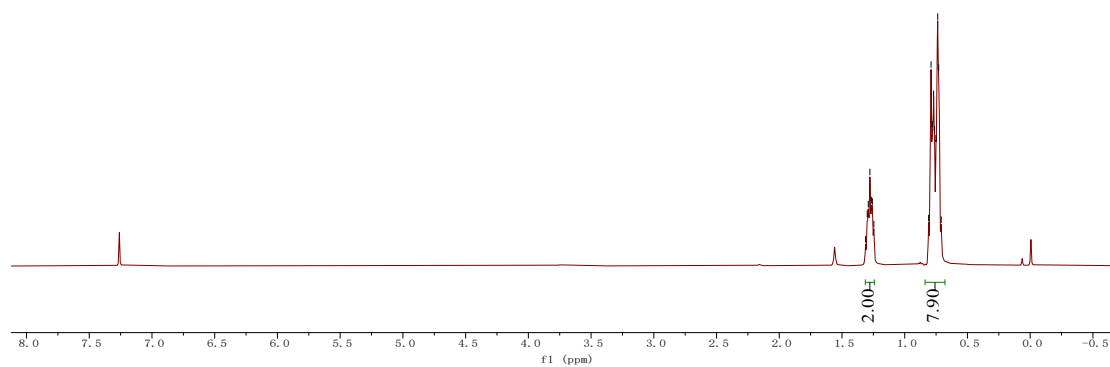

$^{13}\text{C}$  NMR, 101 MHz,  $\text{CDCl}_3$

80.05  
77.35  
77.03  
76.71

60.83

8.71

0.03

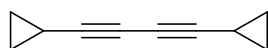

**2o**

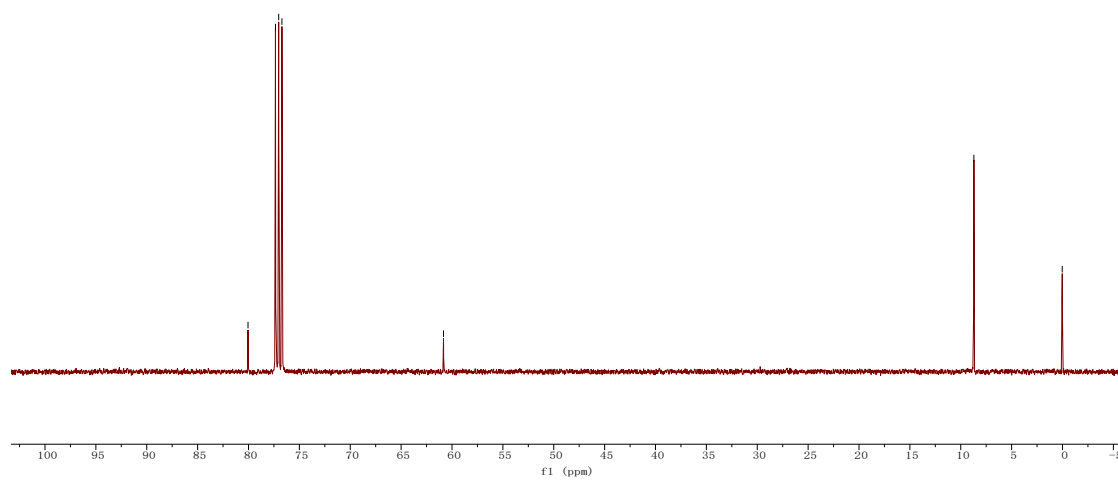

$^1\text{H}$  NMR, 400 MHz,  $\text{CDCl}_3$

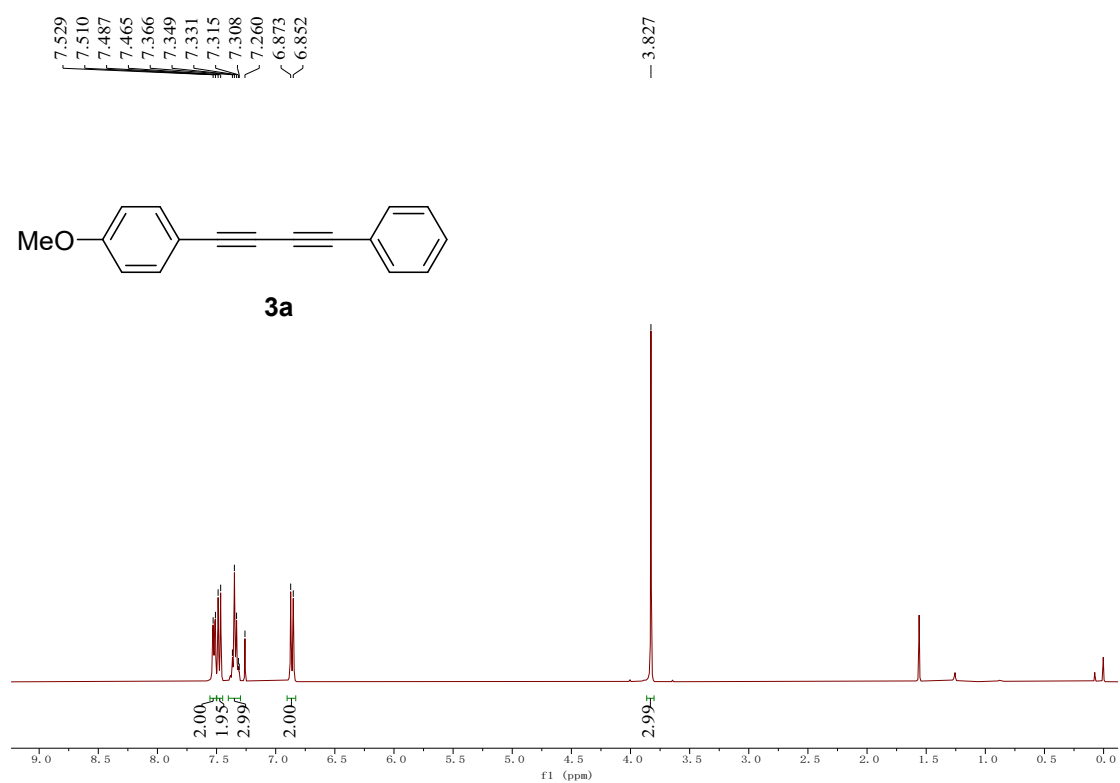

$^{13}\text{C}$  NMR, 101 MHz,  $\text{CDCl}_3$

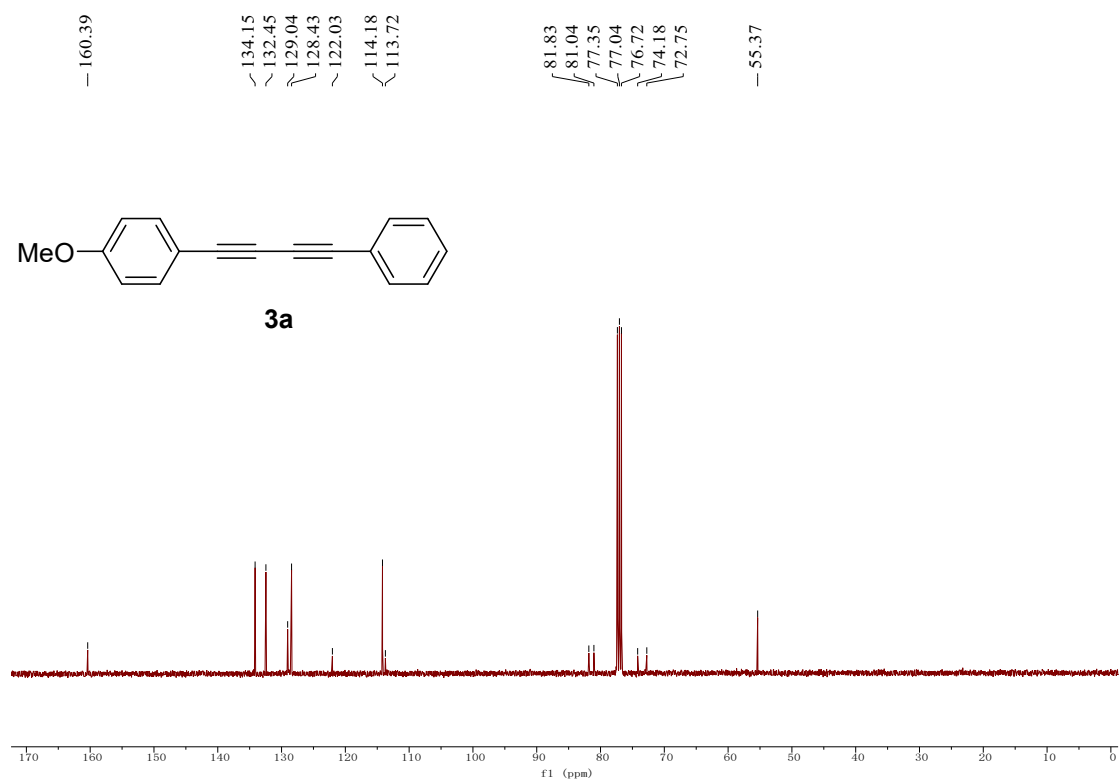

$^1\text{H}$  NMR, 400 MHz,  $\text{CDCl}_3$

7.478  
7.456  
7.425  
7.404  
7.260  
7.149  
7.129  
6.868  
6.846

3.824

2.365

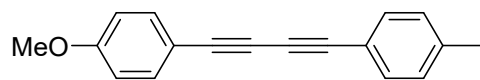

**3b**

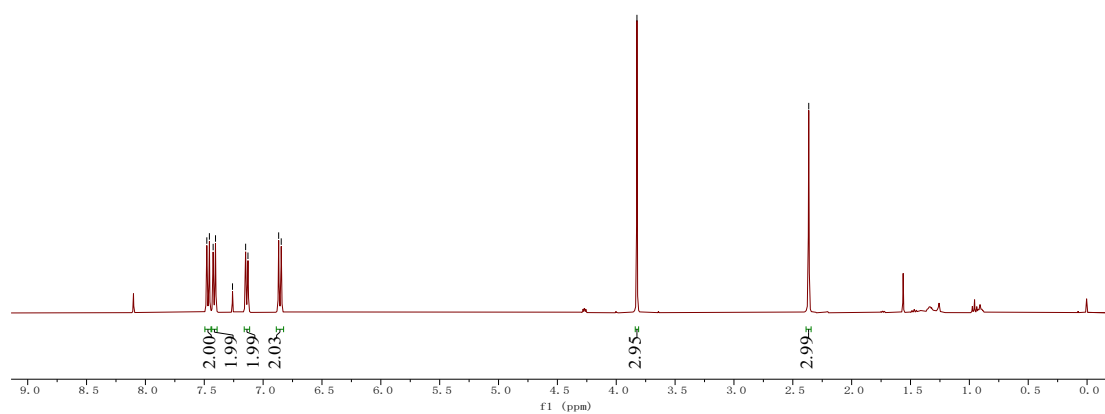

$^{13}\text{C}$  NMR, 101 MHz,  $\text{CDCl}_3$

160.31

139.42

134.10

132.37

129.22

118.89

114.16

113.85

81.48

81.34

77.36

77.04

76.72

73.55

72.87

55.36

21.64

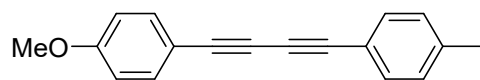

**3b**

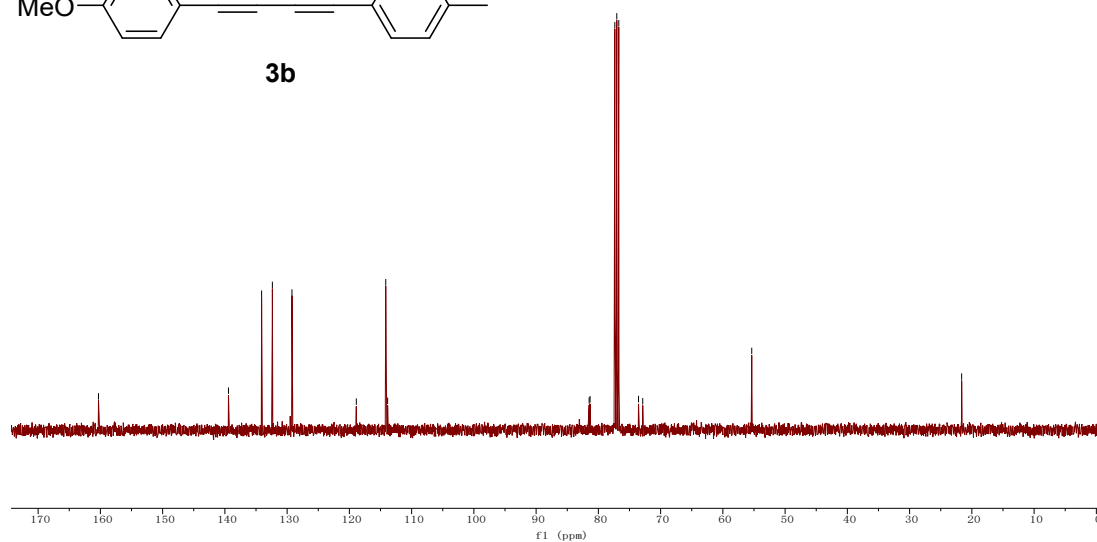

$^1\text{H}$  NMR, 400 MHz,  $\text{CDCl}_3$

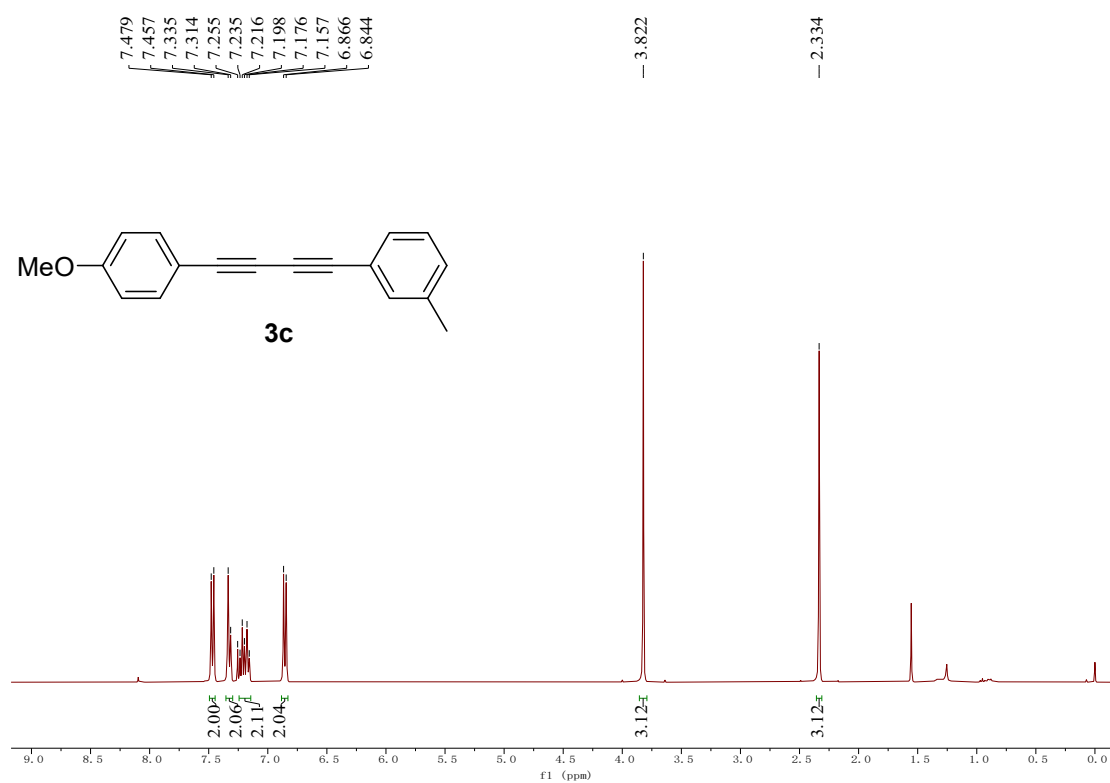

$^{13}\text{C}$  NMR, 101 MHz,  $\text{CDCl}_3$

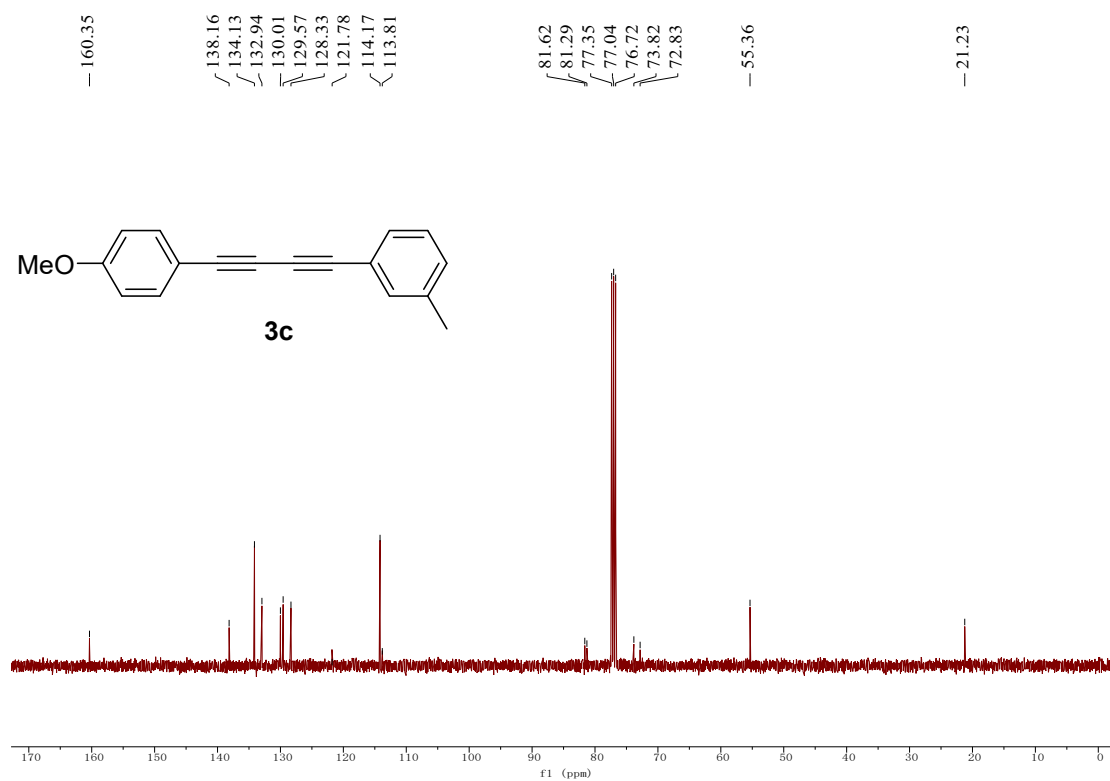

$^1\text{H}$  NMR, 400 MHz,  $\text{CDCl}_3$

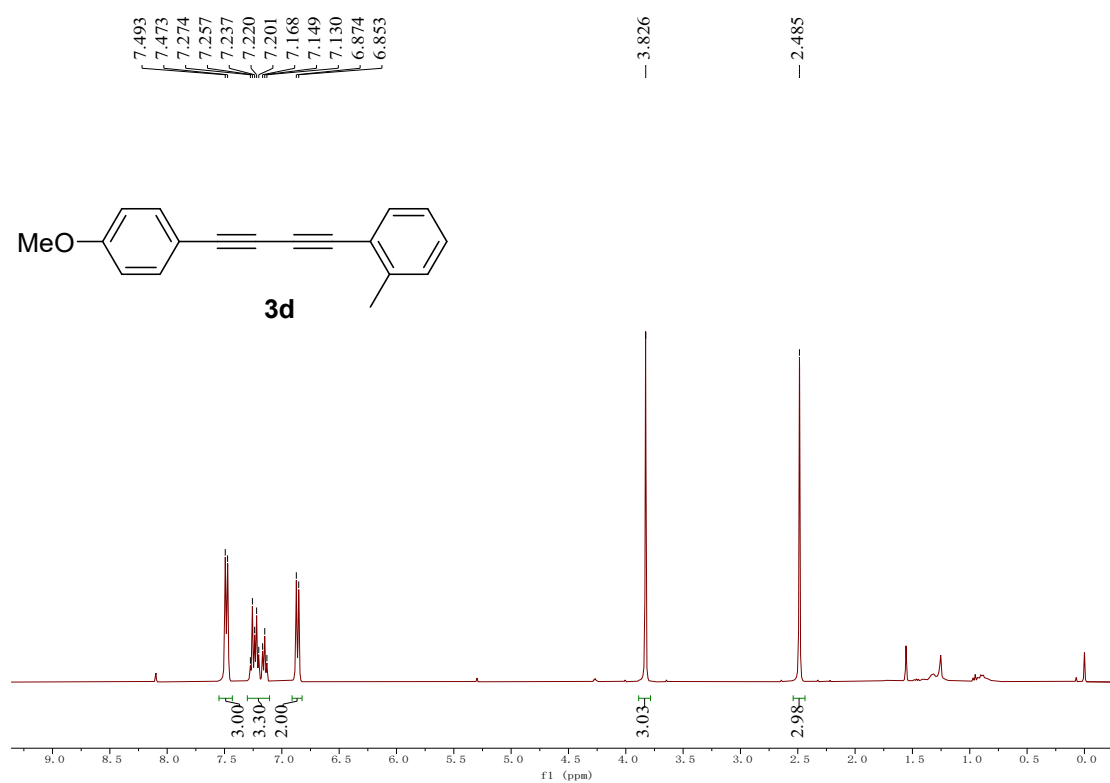

$^{13}\text{C}$  NMR, 101 MHz,  $\text{CDCl}_3$

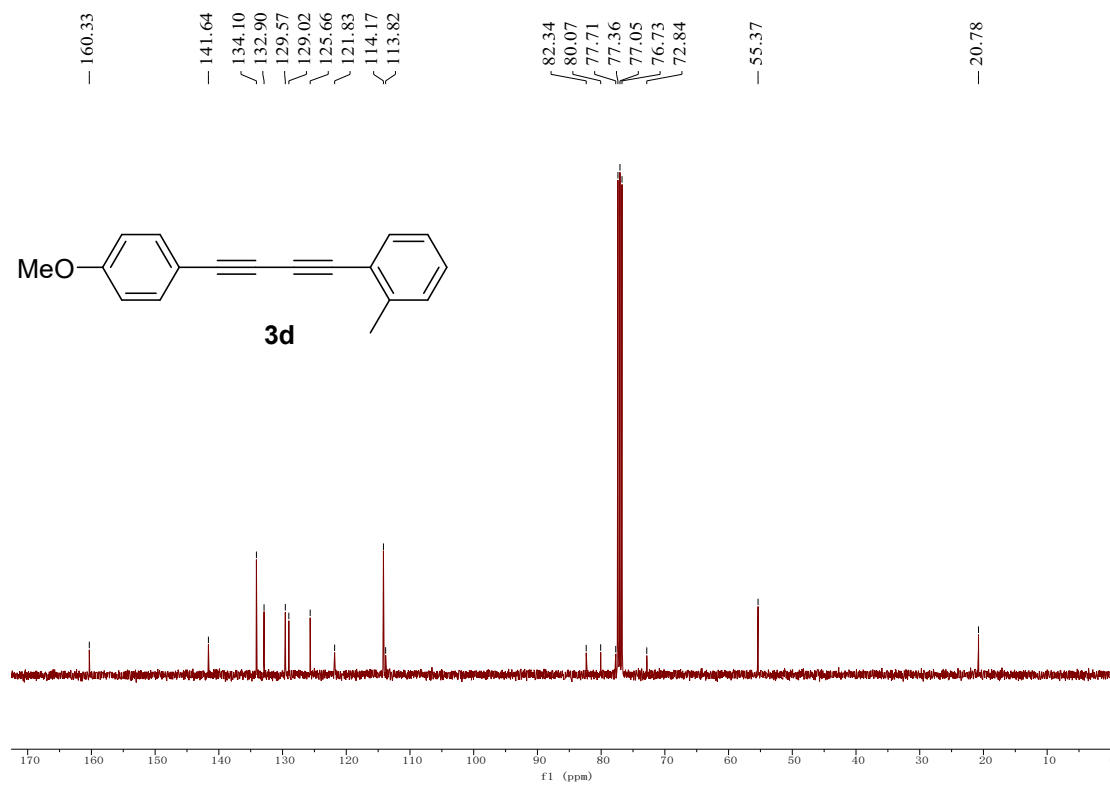

$^1\text{H}$  NMR, 400 MHz,  $\text{CDCl}_3$

7.480  
7.458  
7.444  
7.424  
7.260  
7.151  
7.132  
6.868  
6.847

3.825

2.610  
2.591  
2.572

1.664  
1.646  
1.627  
1.608

0.956  
0.938  
0.919

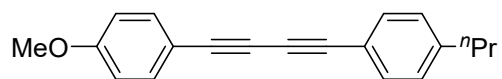

**3e**

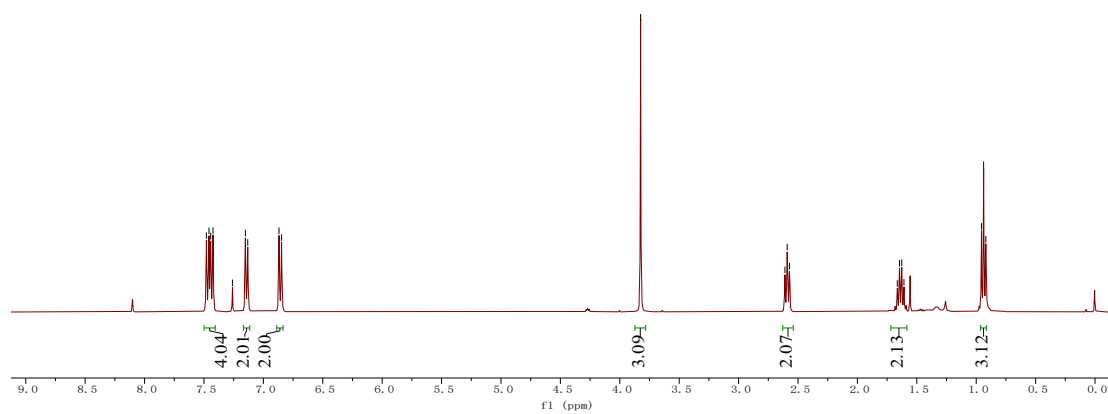

$^{13}\text{C}$  NMR, 101 MHz,  $\text{CDCl}_3$

160.30  
144.17  
134.10  
132.38  
128.63  
119.12  
114.16  
113.87

81.46  
81.39  
77.35  
77.04  
76.72  
73.54  
72.91

55.36

38.05

24.29

13.78

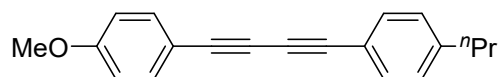

**3e**

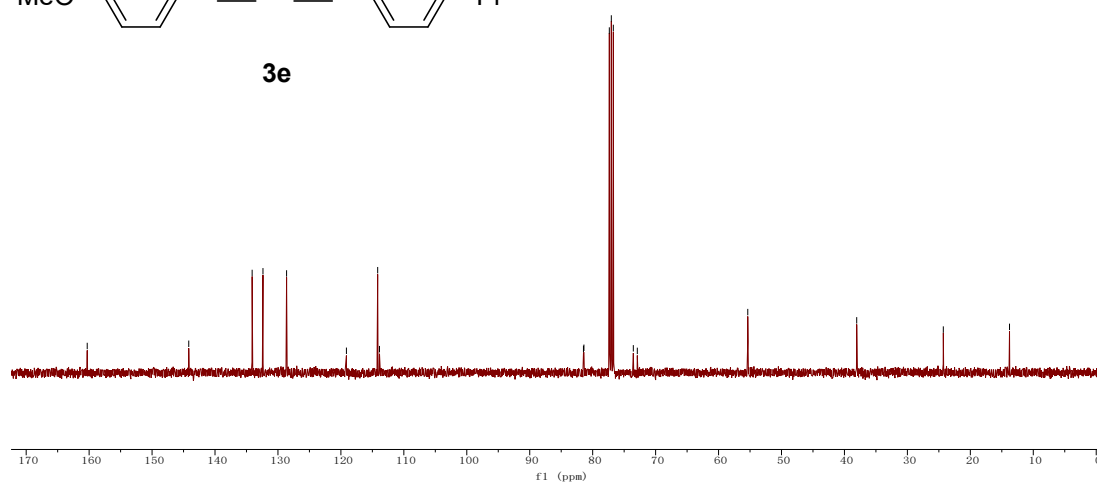

<sup>1</sup>H NMR, 400 MHz, CDCl<sub>3</sub>

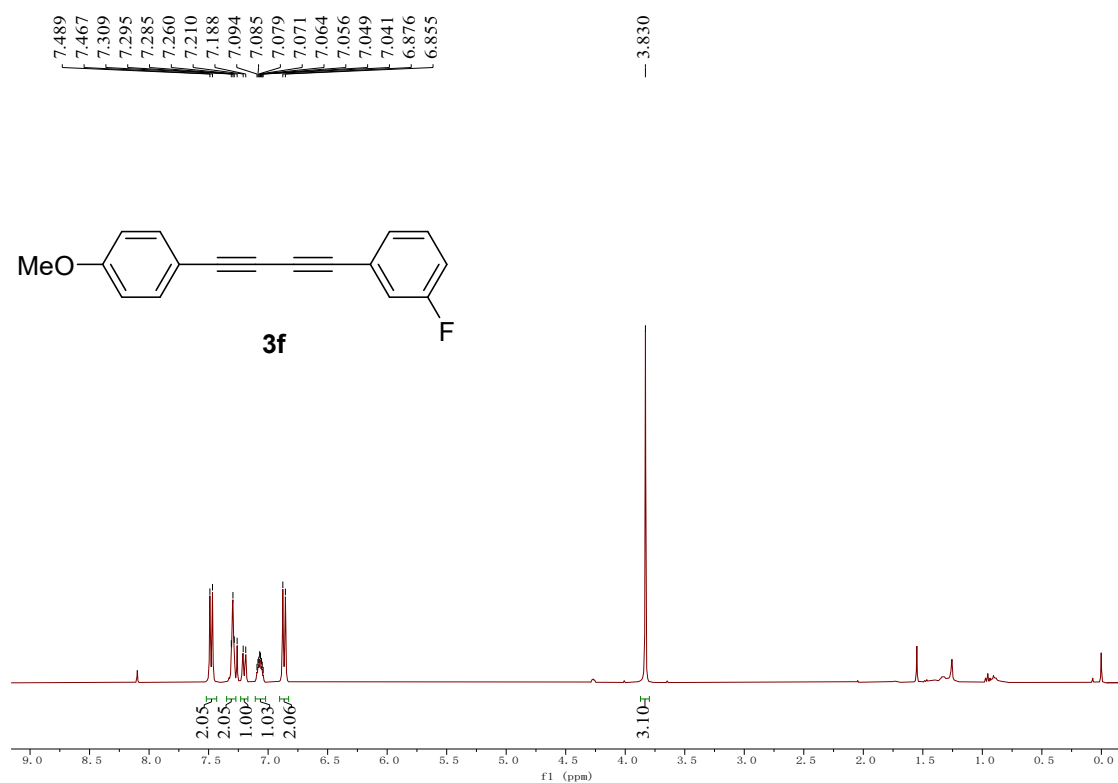

<sup>13</sup>C NMR, 101 MHz, CDCl<sub>3</sub>

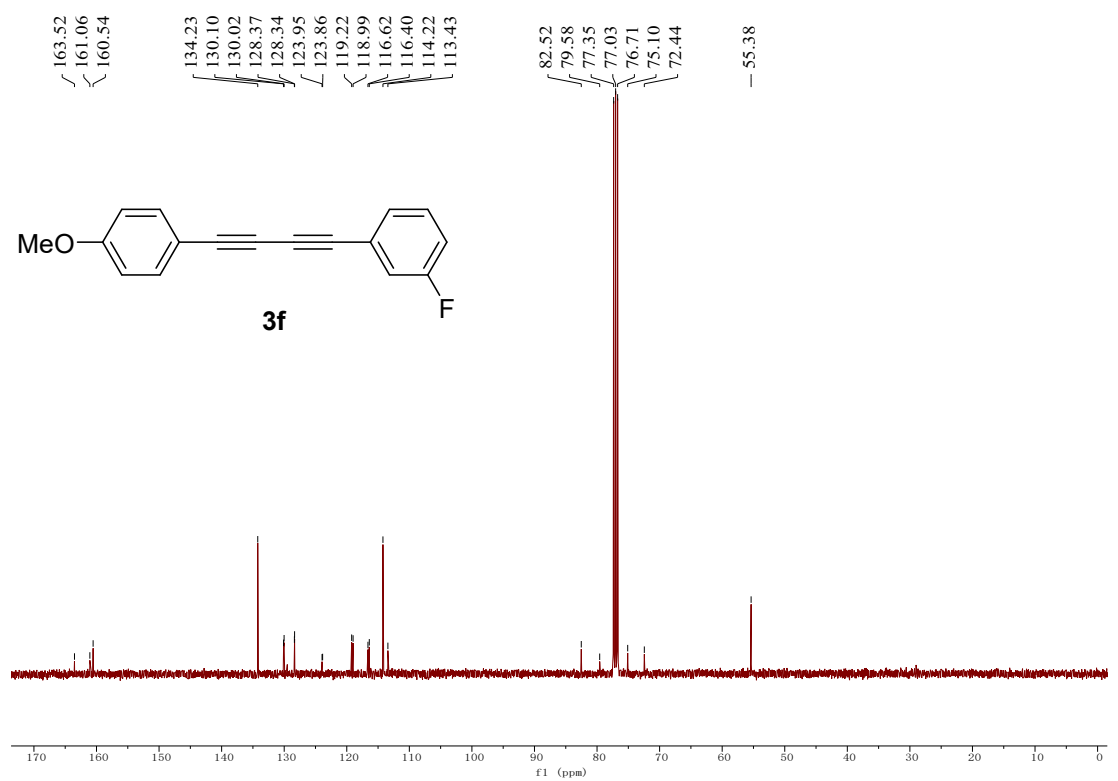



$^1\text{H}$  NMR, 400 MHz,  $\text{CDCl}_3$

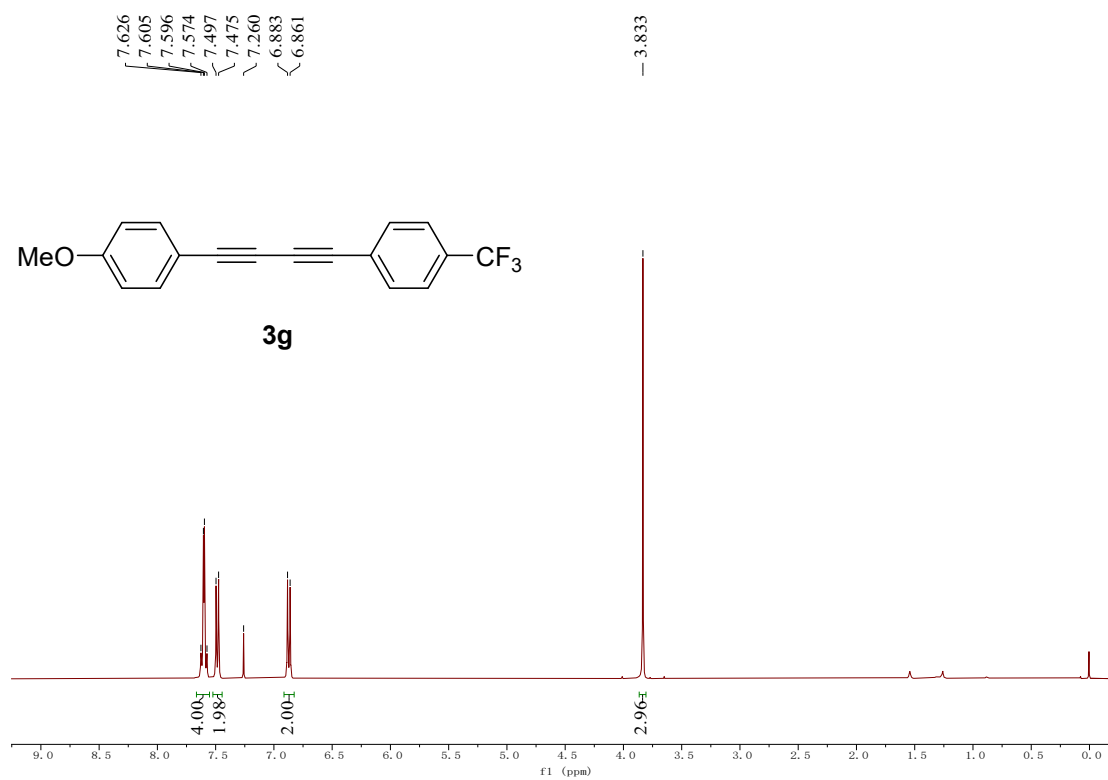

$^{13}\text{C}$  NMR, 101 MHz,  $\text{CDCl}_3$

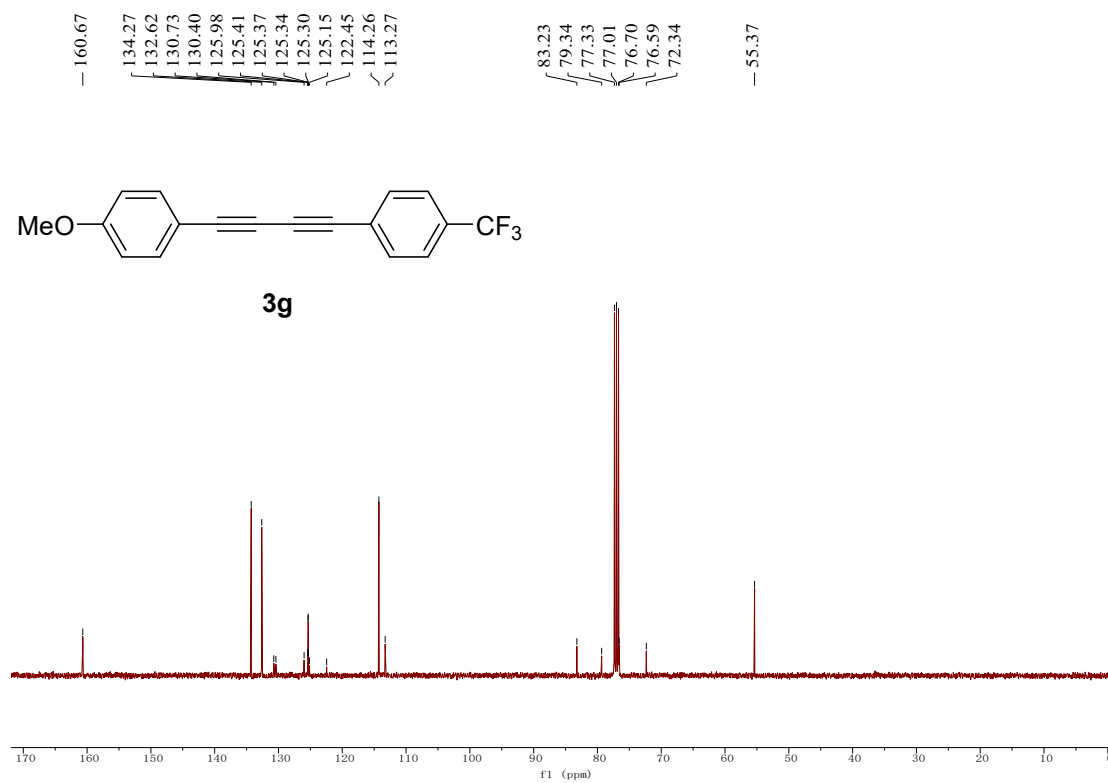

$^1\text{H}$  NMR, 400 MHz,  $\text{CDCl}_3$

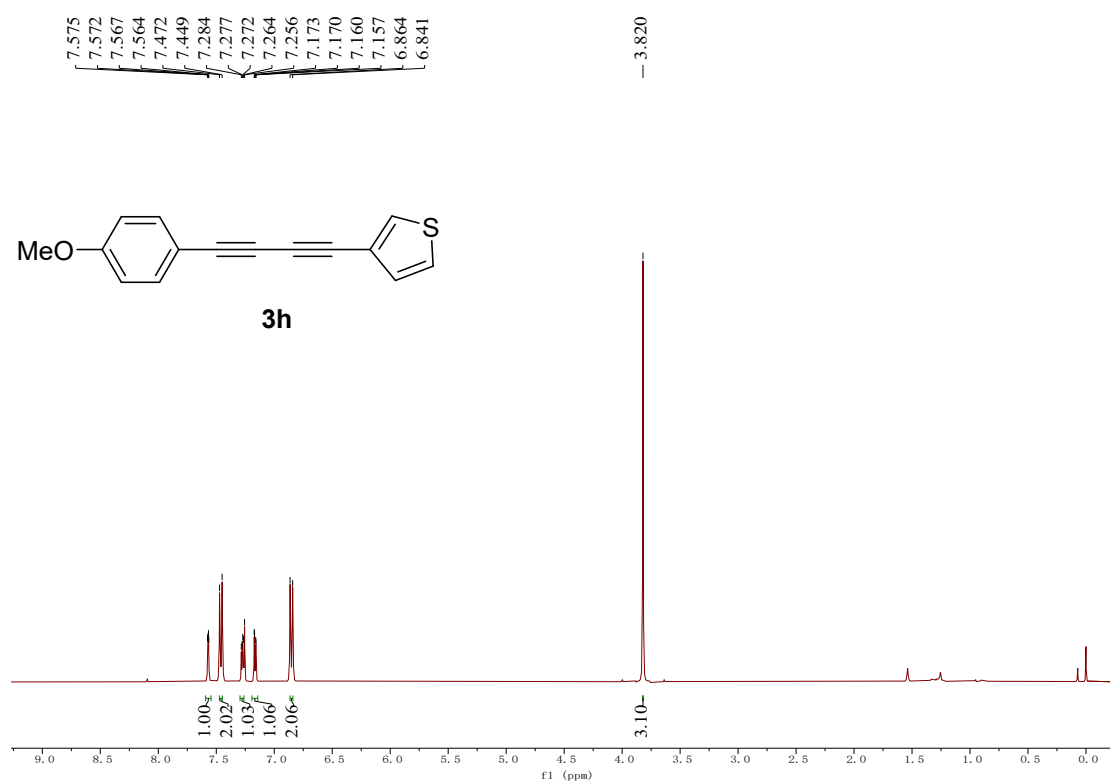

$^{13}\text{C}$  NMR, 101 MHz,  $\text{CDCl}_3$

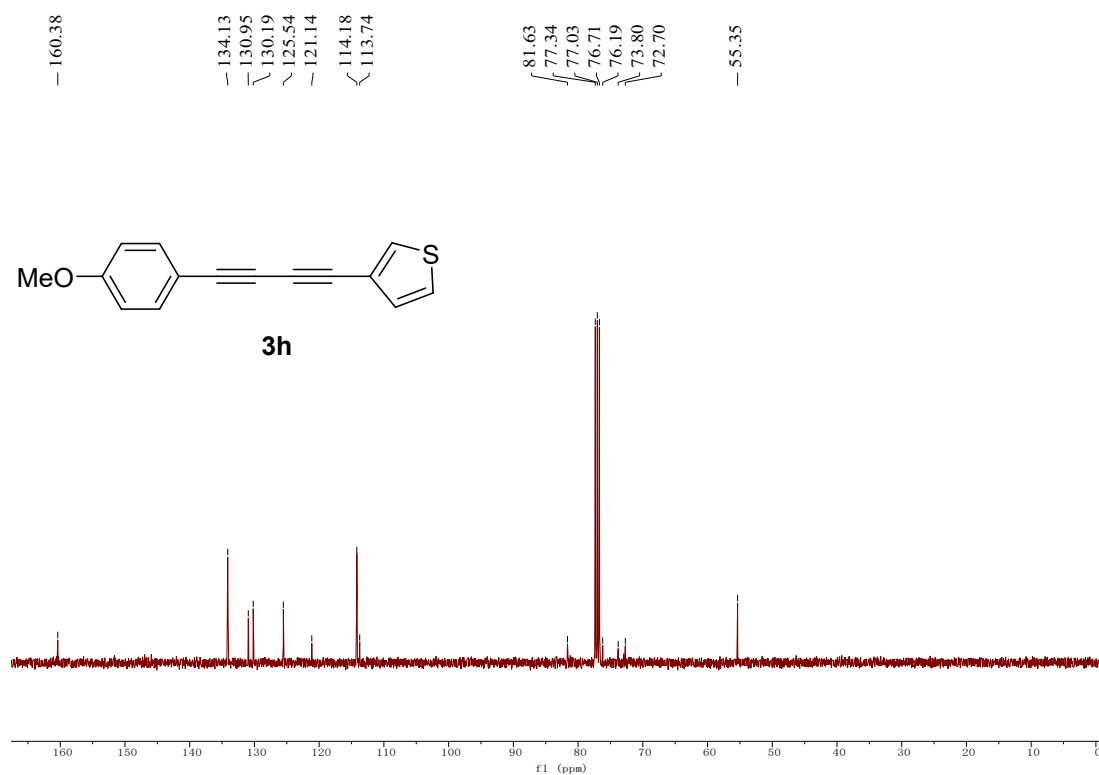

$^1\text{H}$  NMR, 400 MHz,  $\text{CDCl}_3$

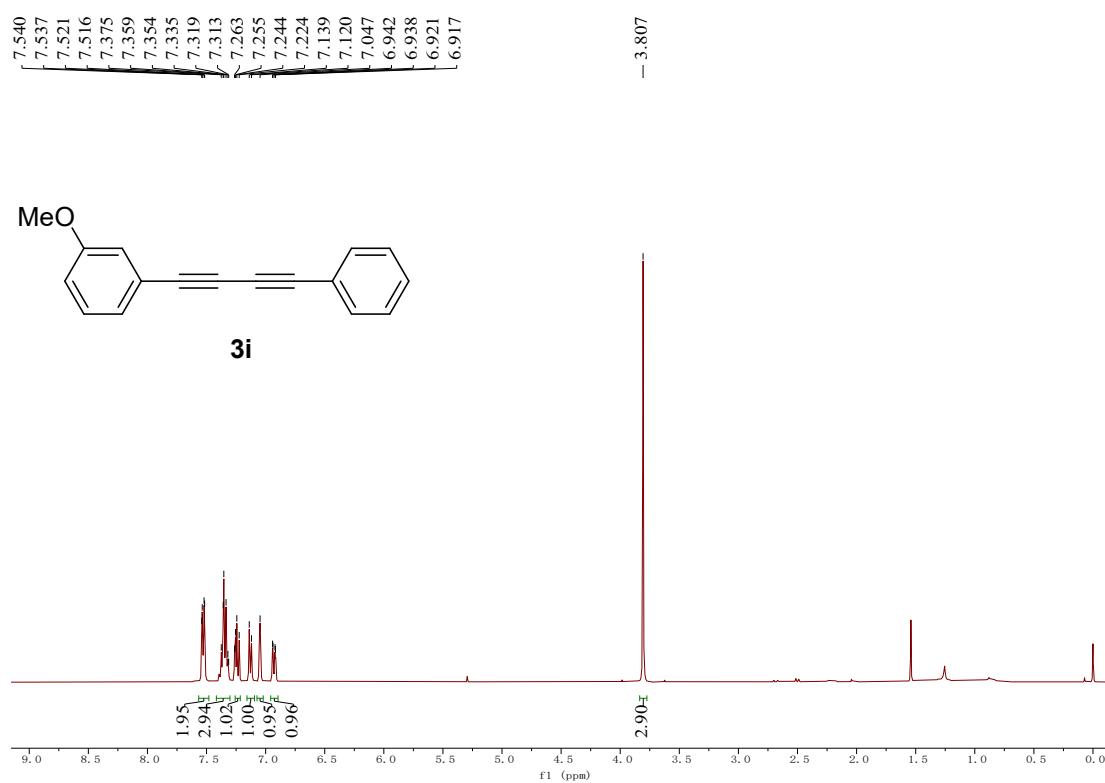

$^{13}\text{C}$  NMR, 101 MHz,  $\text{CDCl}_3$

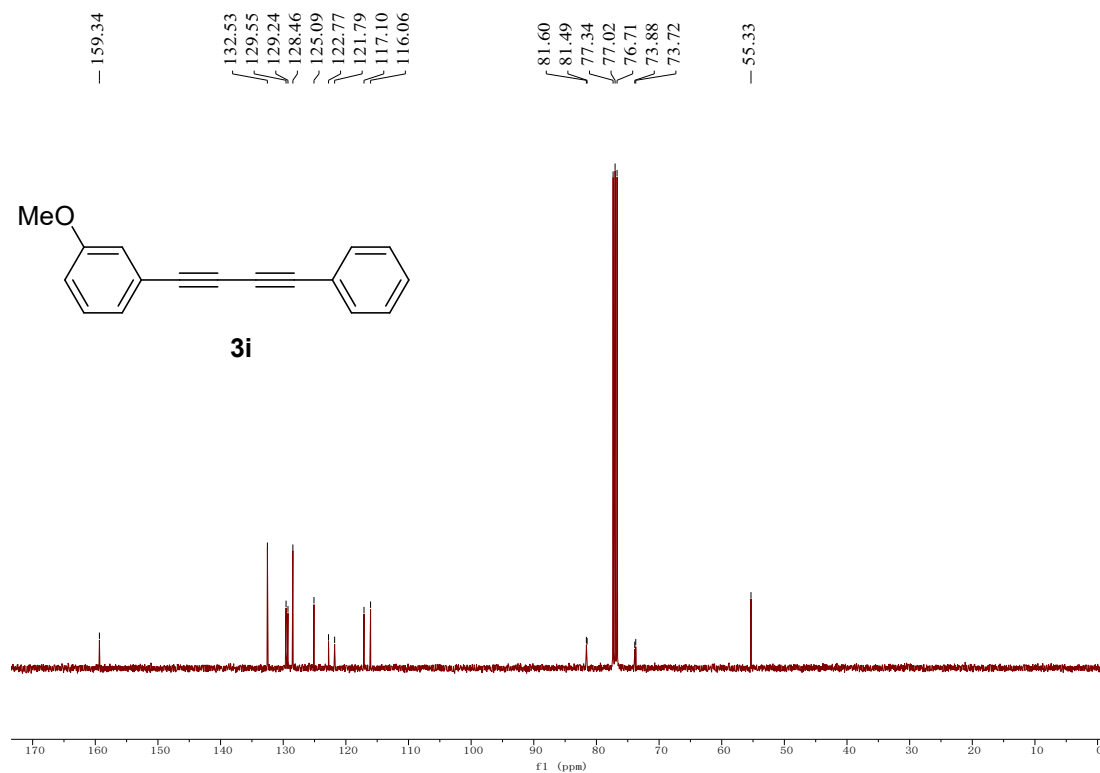

<sup>1</sup>H NMR, 400 MHz, CDCl<sub>3</sub>

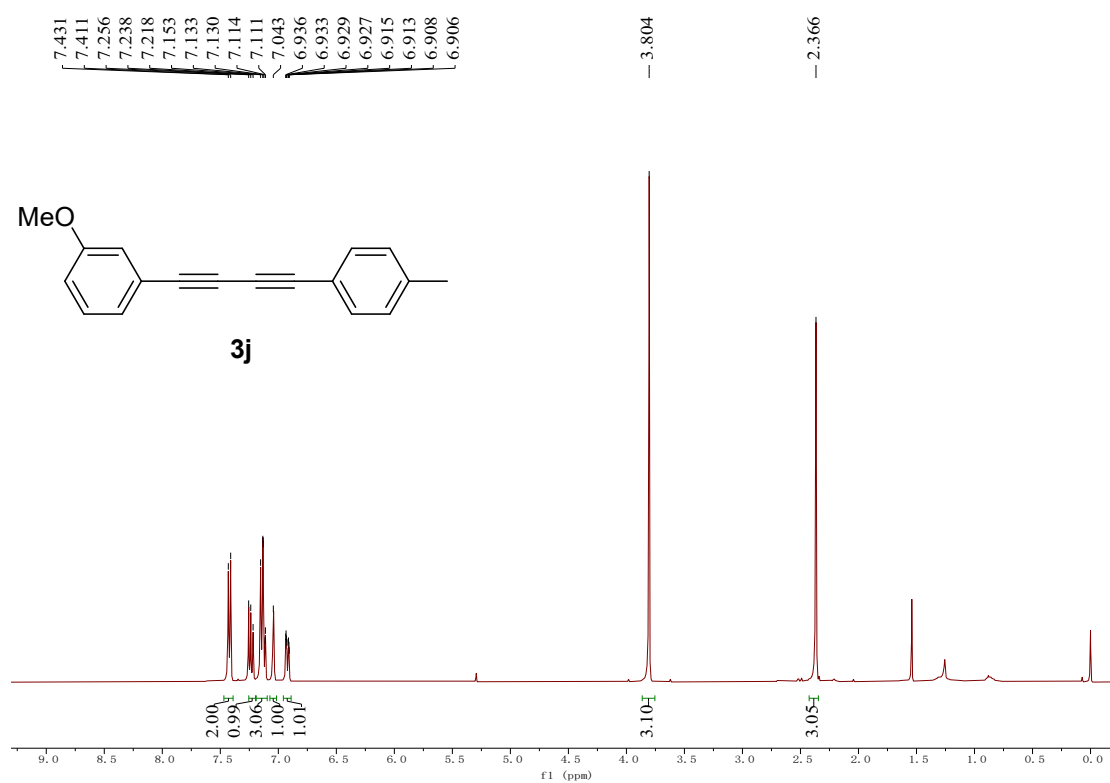

<sup>13</sup>C NMR, 101 MHz, CDCl<sub>3</sub>

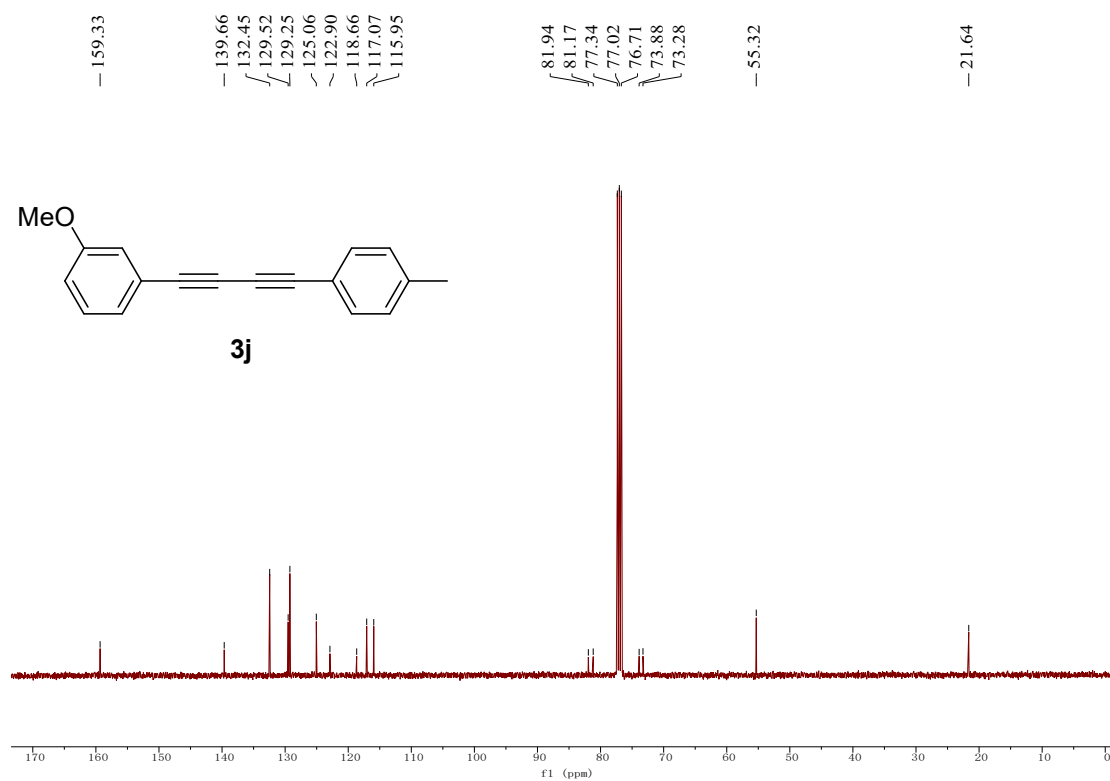

Supplement: d3gc01166f1.pdf [file d3gc01166f1.pdf]
